# Supplementary material
Source: PubMed Central journal article supplement (PMC2945230)

## Supplementary information

### Supplementary methods

#### Whole genome shotgun sequencing

Castor bean inbred cultivar Hale<sup>1</sup> (NSL 4773) seeds were obtained from the National Center for Genetic Resources Preservation (NCGRP) at Ft. Collins, Colorado (Germplasm Resources Information Network). Nuclear DNA from etiolated castor bean seedlings grown in a growth chamber was purified as described<sup>2</sup> and was randomly sheared by nebulization, end-repaired with consecutive BAL31 nuclease and T4 DNA polymerase treatments, and size-selected using gel electrophoresis on 1% low-melting-point agarose. After ligation to *Bst*XI adapters, DNA was purified by three rounds of gel electrophoresis to remove excess adapters, and the fragments were ligated into the vector pHOS2 (a modified pBR322 vector) linearized with *Bst*XI. The pHOS2 plasmid contains two *Bst*XI cloning sites immediately flanked by sequencing-primer binding sites. Six libraries with small average insert size (3.5 to 9 kbp) were constructed by electroporation of the ligation reaction into *E. coli* strain GC10. In addition, two fosmid libraries were constructed using 30  $\mu$ g of DNA that was sheared by bead beating and end-repaired (as described above). Fragments between 39 and 40 kbp were isolated with a pulse field electrophoresis system and ligated to the blunt-end CopyControl pCC1FOS vector (Epicentre, Madison, WI). Lambda phage packaging and infection were performed following the manufacturer instructions. All clones were plated onto large format (16  $\times$  16 cm) diffusion plates prepared by layering 150 ml of antibiotic-free LB-agar onto a previously set 50-ml layer of LB-agar containing ampicillin or chloramphenicol as required by the vector. Colonies were picked for template preparation using Qbot or QPix colony-picking robots (Genetix, <http://www.genetix.com>), inoculated into 384-well blocks containing liquid medium, and incubated overnight with shaking. High-purity plasmid DNA was prepared using the DNA purification robotic workstation custom-built by Thermo CRS (<http://www.thermo.com>) and based on the alkaline lysis miniprep<sup>3</sup> and isopropanol precipitation. The DNA precipitate was washed with 70% ethanol, dried, and re-suspended in 10 mM Tris.HCl buffer containing a trace of blue dextran. The typical yield of plasmid DNA from this method is approximately 600–800 ng per clone, providing sufficient DNA for at least four sequencing reactions per template. Sequencing was carried out using the di-deoxy sequencing method<sup>4</sup>. Two 384-well cycle-sequencing reaction plates were prepared from each plate of plasmid template DNA for opposite-end, paired-sequence reads. Sequencing reactions were completed using the Big Dye Terminator chemistry (Applied Biosystems, <http://www.appliedbiosystems.com>) and standard M13 forward and reverse primers. Reaction mixtures, thermal cycling profiles, and electrophoresis conditions were optimized to reduce the volume of the Big Dye Terminator mix and to extend read lengths on the AB3730xl sequencers (Applied Biosystems). Sequencing reactions were set up using a Biomek FX (Beckman Coulter, <http://www.beckmancoulter.com>) pipetting workstation. Robotics was used to aliquot and combine templates with reaction mixes consisting of deoxy- and fluorescently labeled di-deoxy-nucleotides, DNA polymerase, sequencing primers, and reaction buffer in a 5  $\mu$ l

volume. Bar-coding and tracking systems promoted error-free template and reaction mix handling. After 30–40 consecutive cycles of amplification, reaction products were precipitated with isopropanol, dried at 25°C, resuspended in water, and transferred to an AB3730xl DNA analyzer.

A total of 2,276,000 paired-end sequence reads were attempted yielding 2,079,000 high quality sequences, of which 12% correspond to fosmid clones (40 kbp insert size), 60% to 9 kbp insert size clones, 10% to 5kbp insert size clones and 18% to 3.5 kbp insert clones. The average read length was 839 bp. All reads were assembled into contigs using the Celera assembler<sup>5</sup> version 3.20 that utilizes an "overlay-layout-consensus" approach to produce consensus sequences or contigs. Celera also uses mate-pair read information to build scaffolds where contigs are ordered and oriented relative to each other. The Celera assembler was run using the default parameters for large genomes. In addition to the normal contigs, the assembler creates so-called "degenerate contigs" which have some kind of problem, such as excessive deviation from the expected level of coverage. We manually inspected the degenerate contigs and recovered approximately 12.4 Mbp of sequences that contained plant gene-like sequences as determined by BLAST analysis. The consensus sequences were entered in an in-house genome annotation relational database called RCA1.

As the genomic DNA used for sequencing was purified from non-axenic seedlings, plant-associated bacteria were likely to be present in our sequence. Therefore, contigs smaller than 2 kbp that did not show high level of identity to plant organelle sequences (BLASTN E value cutoff <  $10^{-30}$ ), and showed sequence similarity to bacterial proteins from available bacterial genome sequences with BLASTX E values <  $10^{-20}$  were removed.

### **Closure of sequence gaps**

In order to increase the quality of the ricin gene family annotation, we performed finishing work on 8 scaffolds that contained members of this gene family to close sequence gaps or ambiguities within the corresponding gene models. Closure was conducted by editing the ends of sequence traces, primer walking on plasmid templates, sequencing genomic PCR products that spanned the gaps, or by transposon insertion and sequencing of selected fosmid clones<sup>6</sup>.

### **Gene prediction and genome annotation**

All *Ricinus communis* scaffolds were processed through the TIGR eukaryotic annotation pipeline. Prior to running the gene prediction software, RepeatMasker (<http://repeatmasker.org>) was used to mask the genomic sequence using a library of known plant repeats from an in-house plant repeat database and novel castor bean repeats identified by running RepeatScout, an algorithm that identifies sequences that are overrepresented in the assembly<sup>7</sup>. In order to prevent incorrect annotation of repeats as genes, we took a conservative approach and any sequence repeated at least 10 times in the genome was considered repetitive. Manual inspection of the list of repeats generated by RepeatScout was carried out to remove members of known gene families that were

wrongly reported as repeats. Further screening by manual review was carried out to remove putative gene families that were mistakenly identified as repeats, resulting in a final set of 1,517 consensus repeat sequences. With the so constructed repeat library, 50.33% of the castor bean genome was masked as repetitive sequences. Low complexity sequences and tandem repeats were identified but not masked because they are often part of protein coding sequences. The RepeatScout library masked 49.88% of the genome while the known plant repeat library masked 8.24% of the genome. Repeats were classified using 2994 Viridiplantae repeats from RepBase<sup>8</sup> and the consensus repetitive sequences identified by RepeatScout (Table 2).

Four gene finders were run on the masked genome: FgenesH gene prediction algorithm trained with a dicotyledonous matrix<sup>9</sup>; Augustus trained with *Arabidopsis*<sup>10</sup>; GlimmerHMM trained with *Arabidopsis*<sup>11</sup>; and SNAP trained with *Arabidopsis*<sup>12</sup>.

We used the Program to Assemble Spliced Alignments<sup>13</sup> (PASA) to align 53,516 castor bean cDNA sequences to the castor bean genome. We used all available castor bean cDNA sequences from GenBank at the time, and 52,165 expressed sequence tags (EST) from 5 cDNA non-normalized libraries constructed from mRNAs from leaves, flowers, roots and two different seed developmental stages. cDNA clones were sequenced from the 5' end, except for the root cDNA clones, which were sequenced from both ends to increase the chances of obtaining full-length cDNA sequences. PASA also assembles the aligned cDNA sequences into so-called "PASA assemblies". Using the unmasked castor genome sequence, PASA aligned and assembled approximately 73% of the castor bean cDNA sequences. For a cDNA sequence to be aligned to the genome it should have at least 95% identity along 90% of its length, and consensus splice sites should be present at all inferred exon/intron boundaries. After alignment, PASA generated 8,132 non-redundant cDNA assemblies, of which 5,491 overlapped predicted gene models and 688 identified non-annotated regions. These PASA assemblies were used for identification new gene models as well as to validate or update existing ones. Other PASA assemblies were not incorporated into gene models due intron/exon structure conflicts or because the fragmentary nature of the genome assembly precluded the alignments to meet the stringency criteria.

Sequence homology to nucleotide and protein datasets was computed using the Analysis and Annotation Tool (AAT) package<sup>14</sup> on the unmasked castor bean genome. AAT utilizes a two-step approach consisting of a fast database homology search followed by a rigorous, splice-aware local alignment. The datasets used for AAT analyses included: i) *Oryza sativa* peptides (October 2006 release); ii) *Arabidopsis* proteins (TAIR 6, September 2006 release); iii) an in-house non-redundant amino acid database; iv) A database of transcript assemblies that contains clustered and assembled EST and other cDNA sequences from plant species<sup>15</sup> for which over 1,000 sequences are available in GB at the time (<http://plantta.jcvi.org>).

Proteins having the highest scoring amino acid alignment to our gene models were incorporated into the gene models using GeneWise<sup>16</sup> to increase protein prediction reliability.

All gene structures predicted by the methods described above as well as the alignments to protein and nucleotide databases were combined into consensus gene models using

Evidence Modeler<sup>17</sup> (EVM), a software package developed at The Institute for Genomic Research (TIGR, now the J.C. Venter Institute or JCVI) that integrates data from multiple gene prediction programs as well as protein and cDNA similarity searches, in order to achieve the most accurate annotation possible with automated tools. It uses a non-stochastic weighted-evidence combining technique that accounts for both the type and abundance of evidence to compute weighted consensus gene structures. All potential gene structure components were scored based on manually set weights so that exon and intron structures supported by PASA alignments and high quality protein alignments had the highest relevance in determining a gene model's final structure, and the structure predicted by *ab initio* gene finding software were given lower weights according to their accuracy for castor bean. Evidence from transcript assemblies alignments, protein alignments, and gene prediction software were given a weight of 1, while GeneWise protein alignments received a weight of 5, and the weight of PASA assemblies was set at 20. Dynamic programming then was applied by EVM to find the highest scoring consensus gene structure, supported by all available evidence.

Gene models produced by EVM were then updated by new PASA assembly alignments. PASA extended untranslated regions (UTR) and added small missed exons. This resulted in a total of 31,237 gene models of which 19,768 have either EST or protein support (5,316 gene models have castor bean EST support determined by PASA, and 16,848 have protein evidence support determined by AAT searches). 3,150 models were labeled as “partial” because they missed either start and/or stop codons. 354 gene models contained an internal gap, which is represented by “Ns” in the nucleotide sequence and “Xs” in protein sequence, indicating the location and predicted size of the gap.

A dataset of 60 castor bean genes manually modeled based on highly conserved cDNA and protein alignments across multiple plant species were used as reference to evaluate the gene prediction algorithms' performance in comparison with EVM consensus predictions (Supplementary Table 1). Although this is a small set of genes, we used the exons to estimate the specificity and sensitivity of exon prediction by the different gene finder programs as described<sup>17</sup>. Future iterations of the annotation can be improved by using a larger set of genes for training and evaluation of the gene prediction software, as more castor bean cDNA sequences become available.

Gene models were automatically named and their function was assigned by computationally extracting this information from BLASTP searches against the TAIR6 *Arabidopsis* peptides (<http://www.arabidopsis.org>), Uniprot-Swissprot (<http://www.uniprot.org>), and experimentally verified Panda (<http://www.ebi.ac.uk/panda>), Panther (<http://www.pantherdb.org>), and Interpro (<http://www.ebi.ac.uk/interpro>) databases. Gene models whose hits in those databases were defined as “unknown function” were labeled “conserved hypothetical protein” in our genome annotation. Gene models with no match in these databases above the selected threshold were labeled “hypothetical protein”.

Automated Gene Ontology (<http://www.geneontology.org>) GO term assignments were done by extrapolating GO terms from matching *Arabidopsis* proteins using BLASTP with an E value threshold of  $10^{-40}$ . Castor bean gene models with no match to *Arabidopsis* were screened against Pfam domains (<http://pfam.sanger.ac.uk>) and assigned the Pfam



associated GO term, if matches were above the selected cutoff. Altogether, this resulted in the assignment of 43,657 GO terms to 14,991 *R. communis* proteins.

Putative signal peptide sequences were identified using SignalP<sup>18</sup> and TargetP (<http://www.cbs.dtu.dk/services/TargetP>), and trans-membrane regions were predicted by tmHMM<sup>19</sup>. Castor bean protein domains were also compared against the Pfam database of conserved families<sup>20</sup>. Proteins were organized into putative paralogous families based on conserved domain composition, taking into account both previously identified domains from public databases and potential novel domains identified using independent methods<sup>21,22</sup>.

Non-coding RNAs were identified by searching against various RNA libraries. tRNAscan-SE<sup>23</sup> was run on the assembled genomic sequence to identify tRNAs. All 20 tRNAs were found in the genome with a total of 717 copies. rRNA sequences were annotated based on homology to previously published rRNA sequences in plants. snRNA were searched by blasting against the NONCODE database (<http://www.noncode.org>).

We assigned Enzyme Commission (EC) classification developed by the Nomenclature Committee of the International Union of Biochemistry and Molecular Biology, to provide metabolic pathway annotation. Castor bean proteins were searched against PRIAM profiles<sup>24</sup> using PSI-BLAST, and EC numbers were assigned for hits with an E value lower than  $10^{-10}$ .

Annotation data is displayed in the project website (<http://castorbean.jcvi.org>), which includes a generic genome browser (<http://gmod.org/wiki/GBrowse>), where gene models can be viewed in their sequence and genomic context. We used a gene model nomenclature that is composed by the scaffold ID number, followed by a period and the gene model number that consists of a letter “m” followed by the gene model number. This number can be used to locate genes in the castor bean genome browser. Gene models in the genome browser are linked to Manatee pages, which include additional annotation information (<http://manatee.sourceforge.net>).

The castor bean predicted proteome could be matched to over 3,000 protein domains from Pfam<sup>20</sup>, several of which are not present in *Arabidopsis* or poplar, including secondary metabolism genes (Supplementary Figure 1). However, these results may have a substantial error due to inaccuracies of the automatic annotation both in poplar and castor bean.

We also searched for tandem gene duplications and found a total of 2,610 (8% of the total) genes forming part of tandem arrays.

## Supplementary references

1. Brigham, R. Registration of castor variety Hale (Reg. No. 3). *Crop Sci* **10**, 457 (1970).
2. Rabinowicz, P. D. *et al.* Differential methylation of genes and retrotransposons facilitates shotgun sequencing of the maize genome. *Nat Genet* **23**, 305-308 (1999).
3. Sambrook, J. & Russell, D. W. *Molecular Cloning. A Laboratory Manual*. Third edn, (Cold Spring Harbor Laboratory Press, 2001).
4. Sanger, F., Nicklen, S. & Coulson, A. R. DNA sequencing with chain-terminating inhibitors. *Proc Natl Acad Sci U S A* **74**, 5463-5467 (1977).
5. Myers, E. W. *et al.* A whole-genome assembly of *Drosophila*. *Science* **287**, 2196-2204 (2000).
6. Birren, B., Green, E. D., Klapholz, S., Myers, R. M. & Roskams, J. *Genome Analysis. A Laboratory Manual. Analyzing DNA*. Vol. 1 (Cold Spring Harbor Laboratory Press, 1997).
7. Price, A. L., Jones, N. C. & Pevzner, P. A. De novo identification of repeat families in large genomes. *Bioinformatics* **21 Suppl 1**, i351-358 (2005).
8. Jurka, J. *et al.* Repbase Update, a database of eukaryotic repetitive elements. *Cytogenet Genome Res* **110**, 462-467 (2005).
9. Salamov, A. A. & Solovyev, V. V. Ab initio gene finding in *Drosophila* genomic DNA. *Genome Res* **10**, 516-522 (2000).
10. Stanke, M. & Waack, S. Gene prediction with a hidden Markov model and a new intron submodel. *Bioinformatics* **19 Suppl 2**, ii215-225 (2003).
11. Majoros, W. H., Pertea, M. & Salzberg, S. L. TigrScan and GlimmerHMM: two open source ab initio eukaryotic gene-finders. *Bioinformatics* **20**, 2878-2879 (2004).
12. Korf, I. Gene finding in novel genomes. *BMC Bioinformatics* **5**, 59 (2004).
13. Haas, B. J. *et al.* Improving the Arabidopsis genome annotation using maximal transcript alignment assemblies. *Nucleic Acids Res.* **31**, 5654-5666 (2003).
14. Huang, X., Adams, M. D., Zhou, H. & Kerlavage, A. R. A tool for analyzing and annotating genomic sequences. *Genomics* **46**, 37-45 (1997).
15. Childs, K. L. *et al.* The TIGR Plant Transcript Assemblies database. *Nucleic Acids Res* **35**, D846-851 (2007).
16. Birney, E., Clamp, M. & Durbin, R. GeneWise and Genomewise. *Genome Res* **14**, 988-995 (2004).
17. Haas, B. J. *et al.* Automated eukaryotic gene structure annotation using EVIDENCEModeler and the Program to Assemble Spliced Alignments. *Genome Biol* **9**, R7 (2008).
18. Bendtsen, J. D., Nielsen, H., von Heijne, G. & Brunak, S. Improved prediction of signal peptides: SignalP 3.0. *J Mol Biol* **340**, 783-795 (2004).
19. Krogh, A., Larsson, B., von Heijne, G. & Sonnhammer, E. L. Predicting transmembrane protein topology with a hidden Markov model: application to complete genomes. *J Mol Biol* **305**, 567-580 (2001).
20. Finn, R. D. *et al.* Pfam: clans, web tools and services. *Nucleic Acids Res* **34**, D247-251 (2006).

21. Haas, B. J. *et al.* Complete reannotation of the Arabidopsis genome: methods, tools, protocols and the final release. *BMC Biol* **3**, 7 (2005).
22. Wortman, J. R. *et al.* Annotation of the Arabidopsis genome. *Plant Physiol* **132**, 461-468 (2003).
23. Lowe, T. M. & Eddy, S. R. tRNAscan-SE: a program for improved detection of transfer RNA genes in genomic sequence. *Nucleic Acids Res* **25**, 955-964 (1997).
24. Claudel-Renard, C., Chevalet, C., Faraut, T. & Kahn, D. Enzyme-specific profiles for genome annotation: PRIAM. *Nucleic Acids Res* **31**, 6633-6639 (2003).

## Supplementary tables

**Supplementary Table 1. Sensitivity and specificity at exon level by different gene finders and EVM**

|            | Sensitivity | Specificity |
|------------|-------------|-------------|
| FgenesH    | 0.95        | 0.93        |
| Augustus   | 0.84        | 0.95        |
| GlimmerHMM | 0.90        | 0.96        |
| SNAP       | 0.86        | 0.93        |
| EVM        | 0.99        | 0.98        |

**Supplementary Table 2: Pfam domains found only in one or two of the three genomes analyzed (castor bean, poplar, and *Arabidopsis*).** The numbers of castor bean- and poplar-specific domains may be overestimated as they are based in purely automatic annotation. Once annotation is improved by manual inspection, some of the gene models with domains found only in castor bean may be deemed misannotations.

**Domains specific of *Arabidopsis*:**

| <b>Pfam accession</b> | <b>Description</b>                                   |
|-----------------------|------------------------------------------------------|
| PF05617               | Arabidopsis thaliana protein of unknown function     |
| PF05325               | Protein of unknown function                          |
| PF06975               | Protein of unknown function                          |
| PF07620               | SLEI                                                 |
| PF02721               | Domain of unknown function DUF223                    |
| PF01097               | Arthropod defensin                                   |
| PF07303               | Occludin and RNA polymerase II elongation factor ELL |
| PF06746               | Protein of unknown function                          |
| PF07727               | Reverse transcriptase                                |
| PF08226               | Domain of unknown function                           |
| PF06881               | RNA polymerase II transcription factor SIII          |
| PF00321               | Plant thionin                                        |
| PF07557               | Shugoshin C terminus                                 |
| PF04776               | Protein of unknown function                          |
| PF04642               | Protein of unknown function, DUF601                  |
| PF05391               | Lsm interaction motif                                |
| PF00339               | Arrestin                                             |
| PF04845               | PurA ssDNA and RNA-binding protein                   |
| PF06683               | Protein of unknown function                          |
| PF02606               | tetraacyldisaccharide-1-P 4'-kinase                  |
| PF00537               | Scorpion toxin-like domain                           |
| PF07265               | Tapetum specific protein TAP35/TAP44                 |
| PF04510               | Family of unknown function                           |
| PF04325               | Protein of unknown function                          |
| PF04863               | Alliinase EGF-like domain                            |
| PF06521               | PAR1 protein                                         |
| PF07918               | CAP160 repeat                                        |
| PF06721               | Protein of unknown function                          |
| PF03024               | Folate receptor family                               |
| PF03778               | Protein of unknown function                          |
| PF07794               | Protein of unknown function                          |
| PF03299               | Transcription factor AP-2                            |
| PF03384               | Drosophila protein of unknown function, DUF287       |
| PF05278               | Arabidopsis phospholipase-like protein               |
| PF06651               | Protein of unknown function                          |

**Domains specific of poplar:**

| <b>Pfam accession</b> | <b>Description</b>                           |
|-----------------------|----------------------------------------------|
| PF02603               | HPr                                          |
| PF03626               | Prokaryotic Cytochrome C oxidase subunit IV  |
| PF00961               | LAGLIDADG endonuclease                       |
| PF06434               | aconitate hydratase 2, N-terminal domain     |
| PF00325               | transcriptional regulator, Crp/Fnr family    |
| PF04257               | Exodeoxyribonuclease V, gamma subunit        |
| PF05758               | YcfI                                         |
| PF01127               | Succinate dehydrogenase cytochrome b subunit |

PF05013 N-formylglutamate amidohydrolase  
 PF02233 NAD  
 PF07793 Protein of unknown function  
 PF01497 Periplasmic binding protein  
 PF02501 Bacterial type II secretion system protein I/J  
 PF03524 Conjugal transfer protein  
 PF00345 gram-negative pili assembly chaperone, N-terminal domain  
 PF03576 Peptidase family T4  
 PF00772 replicative DNA helicase  
 PF04341 Protein of unknown function, DUF485  
 PF04262 glutamate-cysteine ligase  
 PF03605 Anaerobic c4-dicarboxylate membrane transporter  
 PF06750 Bacterial Peptidase A24 N-terminal domain  
 PF00871 Acetokinase family  
 PF06983 3-demethylubiquinone-9 3-methyltransferase domain protein  
 PF04546 Sigma-70, non-essential region  
 PF06863 Protein of unknown function  
 PF01790 prolipoprotein diacylglyceryl transferase  
 PF04945 YHS domain  
 PF02435 Levansucrase/Invertase  
 PF01107 viral movement protein  
 PF03279 Bacterial lipid A biosynthesis acyltransferase  
 PF06243 Phenylacetic acid degradation B  
 PF01693 caulimovirus viroplasmin  
 PF02607 B12 binding domain  
 PF05138 Phenylacetic acid catabolic protein  
 PF00908 dTDP-4-dehydrorhamnose 3,5-epimerase  
 PF01654 Bacterial Cytochrome Ubiquinol Oxidase  
 PF07485 Domain of Unknown Function  
 PF02633 creatininase  
 PF06995 Phage P2 GpU  
 PF01943 Polysaccharide biosynthesis protein  
 PF06481 COX Aromatic Rich Motif  
 PF01833 IPT/TIG domain  
 PF07840 FadR C-terminal domain  
 PF00401 ATP synthase, Delta/Epsilon chain, long alpha-helix domain  
 PF02600 disulfide bond formation protein DsbB  
 PF04166 pyridoxal phosphate biosynthetic protein PdxA  
 PF06032 Protein of unknown function  
 PF03814 Potassium-transporting ATPase A subunit  
 PF07947 YhhN-like protein  
 PF02533 Photosystem II 4 kDa reaction center component  
 PF00419 Fimbrial protein  
 PF04993 TfoX N-terminal domain  
 PF06455 NADH dehydrogenase subunit 5 C-terminus  
 PF03988 Repeat of Unknown Function  
 PF05119 phage terminase, small subunit  
 PF02754 Cysteine-rich domain  
 PF04965 GPW / gp25 family  
 PF00662 NADH-Ubiquinone oxidoreductase  
 PF06158 phage tail protein E  
 PF02558 Ketopantoate reductase PanE/ApbA  
 PF02086 D12 class N6 adenine-specific DNA methyltransferase  
 PF02743 Cache domain  
 PF01010 NADH-Ubiquinone oxidoreductase  
 PF04717 phage-related baseplate assembly protein

PF06029 AlkA N-terminal domain  
 PF04954 Siderophore-interacting protein  
 PF08021 Siderophore-interacting FAD-binding domain  
 PF04261 Dyp-type peroxidase family  
 PF04809 HupH hydrogenase expression protein, C-terminal conserved region  
 PF02160 cauliflower mosaic virus peptidase  
 PF01824 MatK/TrnK amino terminal region  
 PF03459 TOBE domain  
 PF04002 DNA repair protein RadC  
 PF02682 allophanate hydrolase subunit 1  
 PF03379 CcmB protein  
 PF02899 Phage integrase, N-terminal SAM-like domain  
 PF01223 DNA/RNA non-specific endonuclease  
 PF03137 Organic Anion Transporter Polypeptide  
 PF03480 Bacterial extracellular solute-binding protein, family 7  
 PF07862 Nitrogen fixation protein of unknown function  
 PF02642 Uncharacterized ACR, COG2107  
 PF02468 Photosystem II reaction centre N protein  
 PF01791 Deoxyribose-phosphate aldolase  
 PF05227 CHASE3 domain  
 PF02411 MerT mercuric transport protein  
 PF06742 Protein of unknown function  
 PF04461 Protein of unknown function  
 PF04081 DNA polymerase delta, subunit 4  
 PF03118 Bacterial RNA polymerase, alpha chain C terminal domain  
 PF02253 Phospholipase A1  
 PF01175 urocanate hydratase  
 PF00821 phosphoenolpyruvate carboxykinase  
 PF03916 Polysulphide reductase, NrfD  
 PF00359 phosphoenolpyruvate-dependent sugar phosphotransferase system, EIIA 2  
 PF04303 Protein of unknown function  
 PF03934 general secretion pathway protein K  
 PF01345 Domain of unknown function  
 PF02378 Phosphotransferase system, EIIC  
 PF00912 Transglycosylase  
 PF02419 PsbL protein  
 PF01311 Bacterial export proteins, family 1  
 PF02420 Insect antifreeze protein  
 PF04060 Putative Fe-S cluster  
 PF00284 Lumenal portion of Cytochrome b559, alpha  
 PF01051 Initiator RepB protein  
 PF05159 Capsule polysaccharide biosynthesis protein  
 PF00796 photosystem I reaction center subunit VIII  
 PF08132 S-adenosyl-l-methionine decarboxylase leader peptide  
 PF07804 HipA-like C-terminal domain  
 PF03681 Uncharacterised protein family  
 PF01475 transcriptional regulator, Fur family  
 PF03976 Polyphosphate kinase 2  
 PF07478 D-ala D-ala ligase C-terminus  
 PF01333 Apocytochrome F, C-terminal  
 PF02674 CvpA family protein  
 PF00712 DNA polymerase III beta subunit, N-terminal domain  
 PF04977 Septum formation initiator  
 PF03748 flagellar basal body-associated protein FliL  
 PF02355 Protein export membrane protein  
 PF01701 photosystem I reaction center subunit IX

PF03775 Septum formation inhibitor MinC, C-terminal domain  
 PF04205 FMN-binding domain  
 PF02965 Vitamin B12 dependent methionine synthase, activation domain  
 PF03979 Sigma-70 factor, region 11  
 PF05816 Toxic anion resistance protein  
 PF02306 major spike protein  
 PF04403 Paraquat-inducible protein A  
 PF01910 Protein of unknown function  
 PF02554 Carbon starvation protein CstA  
 PF01520 N-acetylmuramoyl-L-alanine amidase  
 PF06169 Protein of unknown function  
 PF01252 signal peptidase  
 PF00737 photosystem II 10 kDa phosphoprotein  
 PF03796 DnaB-like helicase C terminal domain  
 PF02694 Uncharacterized BCR, YnfA/UPF0060 family  
 PF01515 Phosphate acetyl/butyryl transferase  
 PF05954 Phage late control gene D protein  
 PF02950 Conotoxin  
 PF06035 Bacterial protein of unknown function  
 PF03972 MmgE/PrpD family  
 PF04378 Protein of unknown function  
 PF04860 phage portal protein  
 PF05838 Protein of unknown function  
 PF01730 UreF  
 PF02572 ATP:corrinoid adenosyltransferase BtuR/CobO/CobP  
 PF01144 Coenzyme A transferase  
 PF02669 K<sup>+</sup>-transporting ATPase, c chain  
 PF04216 Protein involved in formate dehydrogenase formation  
 PF03745 Domain of unknown function  
 PF07063 Protein of unknown function  
 PF03922 OmpW family  
 PF00455 transcriptional regulator, DeoR family  
 PF00499 NADH-ubiquinone/plastoquinone oxidoreductase chain 6  
 PF04198 Putative sugar-binding domain  
 PF00417 Ribosomal protein S3, N-terminal domain  
 PF07549 SecD/SecE GG Motif  
 PF02962 5-carboxymethyl-2-hydroxymuconate delta isomerase  
 PF00873 RND transporter, Hydrophobe/Amphiphile Efflux-1  
 PF04052 TolB amino-terminal domain  
 PF04352 ProQ activator of osmoprotectant transporter ProP  
 PF03004 Plant transposase  
 PF06891 P2 phage tail completion protein R  
 PF01498 transposase  
 PF06865 Protein of unknown function  
 PF03960 ArsC family  
 PF01689 Hydratase/decarboxylase  
 PF02310 B12 binding domain  
 PF05272 Virulence-associated protein E  
 PF03449 Prokaryotic transcription elongation factor, GreA/GreB, N-terminal domain  
 PF04381 Putative exonuclease, RdgC  
 PF04314 Protein of unknown function  
 PF08187 Myoactive tetradecapeptides family  
 PF06805 bacteriophage lambda tail assembly protein I  
 PF02643 uncharacterized ACR, COG1430  
 PF03702 Uncharacterised protein family  
 PF04264 YceI like family



|         |                                                         |
|---------|---------------------------------------------------------|
| PF02615 | Malate/L-lactate dehydrogenase                          |
| PF00283 | Cytochrome b559, alpha                                  |
| PF01580 | FtsK/SpoIIIE family                                     |
| PF00978 | RNA dependent RNA polymerase                            |
| PF05976 | Bacterial membrane protein of unknown function          |
| PF00872 | transposase, Mutator family                             |
| PF04655 | Aminoglycoside/hydroxyurea antibiotic resistance kinase |
| PF02635 | DsrE/DsrF-like family                                   |
| PF06791 | prophage tail length tape measure protein               |
| PF07086 | Protein of unknown function                             |
| PF00375 | transporter, dicarboxylate/amino acid:cation            |
| PF04183 | siderophore biosynthesis protein, IucA/IucC family      |
| PF03797 | Autotransporter beta-domain                             |
| PF04279 | intracellular septation protein A                       |
| PF06821 | Alpha/Beta hydrolase family of unknown function         |
| PF06264 | Protein of unknown function                             |
| PF04985 | phage tail tube protein FII                             |
| PF06527 | TniQ                                                    |
| PF06751 | ethanolamine ammonia-lyase, large subunit               |
| PF07536 | HWE histidine kinase                                    |
| PF01418 | transcriptional regulator, RpiR family                  |
| PF02381 | Domain of unknown function UPF0040 family               |
| PF07475 | HPr Serine kinase C-terminus                            |
| PF08007 | Cupin superfamily protein                               |
| PF07733 | DNA polymerase III, alpha subunit                       |
| PF04226 | Transglycosylase associated protein                     |

### Domains specific of castor bean:

| Pfam accession | Description                                     |
|----------------|-------------------------------------------------|
| PF08472        | Sucrose-6-phosphate phosphohydrolase C-terminal |
| PF08311        | Mad3/BUB1 homology region 1                     |
| PF08342        | Phosphopentomutase N-terminal                   |
| PF05443        | ROS/MUCR transcriptional regulator protein      |
| PF04271        | DnaD-like domain                                |
| PF08282        | haloacid dehalogenase-like hydrolase            |
| PF08668        | HDOD domain                                     |
| PF08645        | Polynucleotide kinase 3 phosphatase             |
| PF08699        | Domain of unknown function                      |
| PF09298        | Domain of unknown function                      |
| PF09339        | IclR helix-turn-helix domain                    |
| PF04313        | Type I restriction enzyme R protein N terminus  |
| PF03808        | Glycosyl transferase WecB/TagA/CpsF family      |
| PF08718        | Glycolipid transfer protein                     |
| PF01904        | Protein of unknown function                     |
| PF01653        | NAD-dependent DNA ligase adenylation domain     |
| PF08498        | Sterol methyltransferase C-terminal             |
| PF03872        | Anti sigma-E protein RseA, N-terminal domain    |
| PF08659        | KR domain                                       |
| PF02108        | flagellar assembly protein FliH                 |
| PF08424        | Protein of unknown function                     |
| PF04351        | pilus assembly protein PilP                     |
| PF03888        | MucB/RseB family                                |
| PF01882        | Protein of unknown function                     |
| PF07023        | Protein of unknown function                     |
| PF08458        | Plant pleckstrin homology-like region           |
| PF02120        | flagellar hook-length control protein           |

PF08780 Nucleotidyltransferase substrate binding protein like  
 PF09261 Alpha mannosidase, middle domain  
 PF02806 Alpha amylase, C-terminal all-beta domain  
 PF03417 Acyl-coenzyme A:6-aminopenicillanic acid acyl-transferase  
 PF08238 Sel1 repeat  
 PF08670 MEKHLA domain  
 PF07508 Recombinase  
 PF08448 PAS fold  
 PF06689 ClpX C4-type zinc finger  
 PF09072 Translation machinery associated TMA7  
 PF08510 PIG-P  
 PF08546 Ketopantoate reductase PanE/ApbA C terminal  
 PF05853 Prokaryotic protein of unknown function  
 PF05681 fumarate hydratase I, N-terminal region or alpha subunit  
 PF01098 cell cycle protein, FtsW/RodA/SpoVE family  
 PF08620 RPAP1-like, C-terminal  
 PF08818 Domain of unknown function  
 PF08170 POPLD  
 PF04032 RNase P Rpr2/Rpp21 subunit domain  
 PF08787 Alginate lyase  
 PF08571 Yos1-like  
 PF08491 Squalene epoxidase  
 PF08246 Cathepsin propeptide inhibitor domain  
 PF06041 Bacterial protein of unknown function  
 PF05235 CHAD domain  
 PF01232 Mannitol dehydrogenase rossman domain  
 PF04999 cell division protein FtsL  
 PF01613 Flavin reductase like domain  
 PF02277 Phosphoribosyltransferase  
 PF08610 Peroxisomal membrane protein  
 PF08771 Rapamycin binding domain  
 PF08767 CRM1 C terminal  
 PF08502 LeuA allosteric  
 PF04331 Family of unknown function  
 PF04445 Protein of unknown function  
 PF08327 Activator of Hsp90 ATPase homolog 1-like protein  
 PF08392 FAE1/Type III polyketide synthase-like protein  
 PF08551 Eukaryotic integral membrane protein  
 PF09179 Domain of unknown function  
 PF09243 Mitochondrial small ribosomal subunit Rsm22  
 PF07468 Agglutinin  
 PF08285 Dolichol-phosphate mannosyltransferase subunit 3  
 PF05662 Haemagglutinin  
 PF08541 3-Oxoacyl-[acyl-carrier-protein  
 PF08615 Ribonuclease H1 small subunit  
 PF08241 Methyltransferase domain  
 PF02933 Cell division protein 48  
 PF04967 HTH DNA binding domain  
 PF09328 Domain of unknown function  
 PF08324 PUL domain  
 PF02561 flagellar protein FliS  
 PF06202 Amylo-alpha-1,6-glucosidase  
 PF08597 Translation initiation factor eIF3 subunit  
 PF01297 Periplasmic solute binding protein family  
 PF09341 Transcription factor Pcc1  
 PF02698 Uncharacterized ACR, COG1434

PF05012 Prophage maintenance system killer protein  
 PF09336 Vps4 C terminal oligomerisation domain  
 PF08623 TATA-binding protein interacting  
 PF00358 phosphoenolpyruvate-dependent sugar phosphotransferase system, EIIA 1  
 PF08755 Hemimethylated DNA-binding protein YccV like  
 PF08514 STAG domain  
 PF08534 Redoxin  
 PF08291 Peptidase M15  
 PF05164 Family of unknown function  
 PF08298 PrkA AAA domain  
 PF02660 Domain of unknown function DUF  
 PF08603 DE Adenylate cyclase associated  
 PF05649 peptidase family M13  
 PF03235 Protein of unknown function DUF262  
 PF02686 glutamyl-tRNA  
 PF08996 DNA Polymerase alpha zinc finger  
 PF08372 Plant phosphoribosyltransferase C-terminal  
 PF01430 chaperonin HslO  
 PF08625 Utp13 specific WD40 associated domain  
 PF03739 putative permease, YjgP/YjgQ family  
 PF03313 Serine dehydratase alpha chain  
 PF08799 pre-mRNA processing factor 4  
 PF08389 Exportin 1-like protein  
 PF04329 Family of unknown function  
 PF08652 RAI1 like  
 PF06684 Protein of unknown function  
 PF08125 Mannitol dehydrogenase C-terminal domain  
 PF00532 Periplasmic binding proteins and sugar binding domain of the LacI family  
 PF08737 Rgp1  
 PF08781 Transcription factor DP  
 PF05717 IS66 family element, Orf2 protein  
 PF05036 sporulation and cell division repeat protein  
 PF08704 tRNA methyltransferase complex GCD14 subunit  
 PF08250 Sperm-activating peptides  
 PF04632 Fusaric acid resistance protein conserved region  
 PF08295 Histone deacetylase  
 PF02121 Phosphatidylinositol transfer protein  
 PF03050 IS66 family element, transposase  
 PF08569 Mo25-like  
 PF06719 AraC-type transcriptional regulator N-terminus  
 PF08536 Whirly transcription factor  
 PF01087 Galactose-1-phosphate uridyl transferase, N-terminal domain  
 PF00353 type I secretion target GGXGXDXXX repeat  
 PF07110 EthD protein  
 PF05067 Manganese containing catalase  
 PF07470 glycosyl hydrolase, family 88  
 PF05772 NinB protein  
 PF02979 Nitrile hydratase, alpha chain  
 PF01568 Molybdopterin dinucleotide binding domain  
 PF08239 Bacterial SH3 domain  
 PF08019 Domain of unknown function  
 PF08501 Shikimate dehydrogenase substrate binding domain  
 PF05594 Haemagglutinin repeat  
 PF09324 Domain of unknown function  
 PF09118 Domain of unknown function  
 PF08646 Replication factor-A C terminal domain

PF07167 Poly-beta-hydroxybutyrate polymerase  
 PF04402 Protein of unknown function  
 PF08545 3-Oxoacyl-[acyl-carrier-protein  
 TIGR03168 1-phosphofructokinase  
 PF08920 Splicing factor 3B subunit 1  
 PF08310 LGFP repeat  
 PF02055 O-Glycosyl hydrolase family 30  
 PF08927 Domain of unknown function  
 PF08697 Tuftelin interacting protein 11  
 PF08698 Fcf2 pre-rRNA processing  
 PF06187 Protein of unknown function  
 PF00700 Bacterial flagellin C-terminus  
 PF06580 Histidine kinase  
 PF08752 Coatomer gamma subunit appendage domain  
 PF02238 Cytochrome c oxidase subunit VIIa  
 PF07772 TP901-1 ORF40-like protein  
 PF08490 Domain of unknown function  
 PF08590 Domain of unknown function  
 PF08628 Sorting nexin C terminal  
 PF09333 ATG C terminal domain  
 PF08338 Domain of unknown function  
 PF08991 Domain of unknown function  
 PF08557 Sphingolipid Delta4-desaturase  
 PF01292 Nickel-dependent hydrogenases b-type cytochrome subunit  
 PF02625 xanthine dehydrogenase accessory factor, putative  
 PF08784 Replication protein A C terminal  
 PF05299 peptidase, M61  
 PF04330 Family of unknown function  
 PF02433 Cytochrome C oxidase, mono-heme subunit/FixO  
 PF01242 6-pyruvoyl tetrahydropterin synthase  
 PF01339 protein-glutamate methylesterase CheB  
 PF01815 rop protein  
 PF08417 Pheophorbide a oxygenase  
 PF03548 Outer membrane lipoprotein carrier protein LolA  
 PF08676 MutL C terminal dimerisation domain  
 PF09262 Peroxisome biogenesis factor 1, N-terminal  
 PF08449 UAA transporter family  
 PF04962 5-keto 4-deoxyuronate isomerase  
 PF06965 Na<sup>+</sup>/H<sup>+</sup> antiporter 1  
 PF02706 Chain length determinant protein  
 PF09258 EXTL2, alpha-1,4-N-acetylhexosaminyltransferase  
 PF08642 Histone deacetylation protein Rxt3  
 PF07484 Phage Tail Collar Domain  
 PF08325 WLM domain  
 PF08513 LisH  
 PF03747 ADP-ribosylglycohydrolase  
 PF06629 MltA-interacting protein MipA  
 PF07001 BAT2 N-terminus  
 PF09229 Activator of Hsp90 ATPase, N-terminal  
 PF03819 MazG nucleotide pyrophosphohydrolase domain  
 PF08506 Cse1  
 PF09329 Primase zinc finger  
 PF07494 Two component regulator propeller  
 PF03472 Autoinducer binding domain  
 PF04946 DGPF domain  
 PF05065 phage capsid family

PF08433 Chromatin associated protein KTI12  
 PF09273 Rubisco LSMT substrate-binding  
 PF09070 PFU  
 PF08542 Replication factor C  
 PF01878 Protein of unknown function  
 PF05658 Hep\_Hag  
 PF08694 Protein of unknown function  
 PF02753 gram-negative pili assembly chaperone, C-terminal domain  
 PF05860 haemagglutination activity domain  
 PF08638 Mediator complex subunit MED14  
 PF08766 DEK C terminal domain  
 PF07648 Kazal-type serine protease inhibitor domain  
 PF08722 TnsA endonuclease N terminal  
 PF08880 QLQ  
 PF09265 Cytokinin dehydrogenase 1, FAD and cytokinin binding  
 PF08381 Disease resistance/zinc finger/chromosome condensation-like region  
 PF08267 Cobalamin-independent synthase, N-terminal domain  
 PF00496 bacterial extracellular solute-binding proteins, family 5  
 PF09282 Mago binding  
 PF09313 Domain of unknown function  
 PF08321 PPP5  
 PF02344 Myc leucine zipper domain  
 PF08334 Bacterial type II secretion system protein G  
 PF05145 Putative ammonia monooxygenase  
 PF08279 HTH domain  
 PF07691 PA14 domain  
 PF05960 Bacterial protein of unknown function  
 PF01041 DegT/DnrJ/EryC1/StrS aminotransferase family  
 PF00896 phosphorylases family 2  
 PF08450 SMP-30/Gluconolactonase/LRE-like region  
 PF00768 D-alanyl-D-alanine carboxypeptidase  
 PF09320 Domain of unknown function  
 PF08825 E2 binding domain  
 PF05736 OmpF membrane domain  
 PF03845 Spore germination protein  
 PF03963 flagellar hook capping protein  
 PF07228 Stage II sporulation protein E  
 PF04336 Protein of unknown function, DUF479  
 PF03648 Glycosyl hydrolase family 67  
 PF08330 Protein of unknown function  
 PF07394 Protein of unknown function  
 PF06073 Bacterial protein of unknown function  
 PF02397 Bacterial sugar transferase  
 PF08672 Anaphase promoting complex  
 PF08292 RNA polymerase III subunit Rpc25  
 PF08613 Cyclin  
 PF05336 Protein of unknown function  
 PF08606 Prp19/Pso4-like  
 PF08242 Methyltransferase domain  
 PF08388 Group II intron, maturase-specific domain  
 PF09325 Vps5 C terminal like  
 PF08785 Ku C terminal domain like  
 PF03349 Outer membrane protein transport protein  
 PF02342 Bacterial stress protein  
 PF08234 Kinetochore protein Spc25  
 PF01548 Transposase

PF07497 Rho termination factor, RNA-binding domain  
 PF06776 Invasion associated locus B  
 PF04820 Tryptophan halogenase  
 PF08561 Mitochondrial ribosomal protein L37  
 PF06483 Chitinase C  
 PF01757 putative acyltransferase  
 PF08806 Sep15/SelM redox domain  
 PF09066 Beta2-adaptin appendage, C-terminal sub-domain  
 PF08512 Histone chaperone Rtp106-like  
 PF08523 Multiprotein bridging factor 1  
 PF07681 DoxX  
 PF08318 COG4 transport protein  
 PF08269 Cache domain  
 PF08244 Glycosyl hydrolases family 32 C terminal  
 PF08370 Plant PDR ABC transporter associated  
 PF08617 Kinase binding protein CGI-121  
 PF03965 transcriptional regulator, Blal/MecI/CopY family  
 PF08446 PAS fold  
 PF09084 NMT1/THI5 like  
 PF07811 TadE-like protein  
 PF05947 Bacterial protein of unknown function  
 PF09110 HAND  
 PF09296 NADH pyrophosphatase-like rudimentary NUDIX domain  
 PF08637 ATP synthase regulation protein NCA2  
 PF07277 SapC  
 PF09268 Clathrin, heavy-chain linker  
 PF03713 Domain of unknown function  
 PF03119 NAD-dependent DNA ligase C4 zinc finger domain  
 PF04011 LemA family  
 PF08696 DNA replication factor Dna2  
 PF08777 RNA binding motif  
 PF02547 Queuosine biosynthesis protein  
 PF09139 Mitochondrial matrix Mmp37  
 PF05992 SbmA/BacA-like family  
 PF06055 Exopolysaccharide synthesis, ExoD  
 PF08662 Eukaryotic translation initiation factor eIF2A  
 PF08492 SRP72 RNA-binding domain  
 PF03668 Uncharacterised P-loop ATPase protein family  
 PF05433 Rickettsia 17 kDa surface antigen  
 PF05524 phosphoenolpyruvate-protein phosphotransferase, N-terminal  
 PF09177 Syntaxin 6, N-terminal  
 PF05683 fumarate hydratase I, C-terminal region or beta subunit  
 PF05345 Putative Ig domain  
 PF04471 Restriction endonuclease  
 PF01523 TldD/PmbA family  
 PF03886 Protein of unknown function  
 PF02289 Cyclohydrolase  
 PF08712 Scaffold protein Nfu/NifU N terminal  
 PF03120 NAD-dependent DNA ligase OB-fold domain  
 PF06748 Protein of unknown function  
 PF08879 WRC  
 PF07506 RepB plasmid partitioning protein  
 PF01219 Prokaryotic diacylglycerol kinase  
 PF08442 ATP-grasp domain  
 PF01887 Protein of unknown function  
 PF04390 Rare lipoprotein B family

PF04964 Flp/Fap pilin component  
 PF00135 Carboxylesterase  
 PF03734 ErfK/YbiS/YcfS/YnhG  
 PF02872 5'-nucleotidase, C-terminal domain  
 PF02211 nitrile hydratase, beta subunit  
 PF09334 tRNA synthetases class I  
 PF09103 BRCA2, oligonucleotide/oligosaccharide-binding, domain 1  
 PF05523 WxcM-like, C-terminal  
 PF01555 DNA methylase  
 PF08783 DWNN domain  
 PF09173 Initiation factor eIF2 gamma, C terminal  
 PF05866 crossover junction endodeoxyribonuclease RusA  
 PF08802 Cytochrome B6-F complex Fe-S subunit  
 PF07505 Phage protein Gp37/Gp68  
 PF08772 Nin one binding  
 PF08373 RAP domain  
 PF01522 Polysaccharide deacetylase  
 PF08264 Anticodon-binding domain  
 PF08544 GHMP kinases C terminal  
 PF05673 Protein of unknown function  
 PF03707 Bacterial signalling protein N terminal repeat  
 PF02684 lipid-A-disaccharide synthetase  
 PF08278 DNA primase DnaG DnaB-binding  
 PF08911 NUP50  
 PF05930 transcriptional regulator, AlpA family  
 PF08797 HIRAN domain  
 PF05359 Domain of Unknown Function  
 PF06423 GWT1  
 PF05494 toluene tolerance protein Ttg2D  
 PF01454 MAGE family  
 PF02614 glucuronate isomerase  
 PF08847 Domain of unknown function  
 PF08666 SAF domain  
 PF08839 DNA replication factor CDT1 like  
 PF07045 Protein of unknown function  
 PF08271 TFIIB zinc-binding  
 PF08612 TATA-binding related factor  
 PF08356 EF hand associated  
 PF08423 Rad51  
 PF08281 Sigma-70, region 4  
 PF04014 SpoVT / AbrB like domain  
 PF02583 Uncharacterized BCR, COG1937  
 PF09279 Phosphoinositide-specific phospholipase C, ehand-like  
 PF06320 GCN5-like protein 1  
 PF08352 Oligopeptide/dipeptide transporter, C-terminal region  
 PF08661 Replication factor A protein 3  
 PF08459 UvrC Helix-hairpin-helix N-terminal  
 PF06146 protein PsiE  
 PF07152 YaeQ protein  
 PF06996 Protein of unknown function  
 PF06114 Domain of unknown function  
 PF08436 1-deoxy-D-xylulose 5-phosphate reductoisomerase C-terminal  
 PF08648 Protein of unknown function  
 PF00016 Ribulose biphosphate carboxylase large chain, catalytic domain  
 PF02563 Polysaccharide biosynthesis/export protein  
 PF07836 DmpG-like communication domain

|         |                                                         |
|---------|---------------------------------------------------------|
| PF03985 | Paf1                                                    |
| PF08477 | Miro-like protein                                       |
| PF08743 | Nse4                                                    |
| PF08572 | pre-mRNA processing factor 3                            |
| PF08547 | Complex I intermediate-associated protein 30            |
| PF08719 | Domain of unknown function                              |
| PF08701 | GNL3L/Gm1 putative GTPase                               |
| PF08555 | Eukaryotic family of unknown function                   |
| PF09111 | SLIDE                                                   |
| PF01235 | Sodium:alanine symporter family                         |
| PF07589 | Protein of unknown function                             |
| PF08245 | Mur ligase middle domain                                |
| PF08326 | Acetyl-CoA carboxylase, central region                  |
| PF02082 | Transcriptional regulator                               |
| PF08387 | FBD                                                     |
| PF08243 | SPT2 chromatin protein                                  |
| PF03550 | outer membrane lipoprotein LolB                         |
| PF07971 | glycosyl hydrolase, family 92                           |
| PF03717 | Penicillin-binding Protein dimerisation domain          |
| PF08774 | VRR-NUC domain                                          |
| PF08711 | Transcription elongation factor S-II protein N terminal |
| PF02350 | UDP-N-acetylglucosamine 2-epimerase                     |
| PF08235 | LNS2                                                    |
| PF06761 | ImcF-related                                            |
| PF08660 | Oligosaccharide biosynthesis protein Alg14 like         |
| PF02113 | D-Ala-D-Ala carboxypeptidase 3                          |
| PF05344 | Domain of Unknown Function                              |
| PF04476 | Protein of unknown function                             |
| PF06293 | Lipopolysaccharide kinase                               |
| PF01628 | HrcA protein C terminal domain                          |
| PF08443 | RimK-like ATP-grasp domain                              |
| PF08328 | Adenylosuccinate lyase C-terminal                       |
| PF02868 | Thermolysin metallopeptidase, alpha-helical domain      |
| PF08644 | FACT complex subunit                                    |
| PF08263 | Leucine rich repeat N-terminal domain                   |
| PF01321 | Creatinase                                              |
| PF03121 | Herpesviridae UL52/UL70 DNA primase                     |
| PF07987 | Nuclear export factor GLE1                              |
| PF08375 | Proteasome regulatory subunit C-terminal                |
| PF08447 | PAS fold                                                |
| PF09079 | CDC6, C terminal                                        |
| PF08538 | Protein of unknown function                             |
| PF04524 | Protein of unknown function, DUF586                     |
| PF02604 | addiction module antitoxin, Axe family                  |
| PF02368 | Bacterial Ig-like domain                                |
| PF08626 | Transport protein Trs120                                |
| PF09297 | NADH pyrophosphatase zinc ribbon domain                 |
| PF08276 | PAN-like domain                                         |
| PF03428 | replication protein C                                   |
| PF03186 | CobD/CbiB protein                                       |
| PF09269 | Domain of unknown function                              |
| PF08293 | Mitochondrial ribosomal subunit S27                     |
| PF05229 | Spore Coat Protein U domain                             |
| PF08312 | cwf1                                                    |
| PF08414 | Respiratory burst NADPH oxidase                         |
| PF00030 | Beta/Gamma crystallin                                   |



PF08315 cwf18 pre-mRNA splicing factor  
 PF08540 Hydroxymethylglutaryl-coenzyme A synthase C terminal  
 PF03575 Peptidase family S51  
 PF08288 PIGA  
 PF08576 Eukaryotic protein of unknown function  
 PF02421 ferrous iron transport protein B  
 PF09278 MerR, DNA binding  
 PF08294 TIM21  
 PF08621 RPAP1-like, N-terminal  
 PF09088 MIF4G like  
 PF08543 Phosphomethylpyrimidine kinase  
 PF09180 Prolyl-tRNA synthetase, C-terminal  
 PF09280 XPC-binding domain  
 PF01695 IstB-like ATP binding protein  
 PF06559 2'-deoxycytidine 5'-triphosphate deaminase  
 PF04355 SmpA / OmlA family  
 PF09192 Actin-fragmin kinase, catalytic  
 PF08367 Peptidase M16C associated  
 PF07042 TrfA protein  
 PF09326 Domain of unknown function  
 PF08614 Autophagy protein 16  
 PF05426 Alginate lyase  
 PF00959 phage lysozyme  
 PF03412 peptidase, C39 family  
 PF00296 Luciferase-like monooxygenase  
 PF03883 Protein of unknown function  
 PF06812 ImpA-related N-terminal  
 PF02677 Uncharacterized BCR, COG1636  
 PF04087 Domain of unknown function  
 PF08801 Nup133 N terminal like  
 PF09335 SNARE associated Golgi protein  
 PF08746 RING-like domain  
 PF08265 YL1 nuclear protein C-terminal domain  
 PF09090 MIF4G like  
 PF09285 Elongation factor P, C-terminal  
 PF08608 Wyosine base formation  
 PF08240 Alcohol dehydrogenase GroES-like domain  
 PF00245 alkaline phosphatase family protein  
 PF08351 Domain of unknown function  
 PF08511 COQ9  
 PF09340 Histone acetyltransferase subunit NuA4  
 PF08323 Starch synthase catalytic domain  
 PF06571 Protein of unknown function  
 PF07745 glycosyl hydrolase, family 53  
 PF08790 LYAR-type C2HC zinc finger  
 PF06189 5'-nucleotidase  
 PF09127 Leukotriene A4 hydrolase, C-terminal  
 PF08355 EF hand associated  
 PF08669 Glycine cleavage T-protein C-terminal barrel domain  
 PF01850 PIN domain  
 PF08640 U3 small nucleolar RNA-associated protein 6  
 PF06745 KaiC  
 PF03631 Ribonuclease BN-like family  
 PF09138 Urm1  
 PF05569 peptidase, M56 family  
 PF08585 Domain of unknown function

PF02278 Polysaccharide lyase family 8, super-sandwich domain  
 PF02582 Uncharacterized ACR, YagE family COG1723  
 TIGR02477 diphosphate--fructose-6-phosphate 1-phosphotransferase

**Domains shared by castor bean and poplar:**

| <b>Pfam accession</b> | <b>Description</b>                                               |
|-----------------------|------------------------------------------------------------------|
| PF02481               | SMF family                                                       |
| PF01478               | peptidase, A24                                                   |
| PF02371               | Transposase IS116/IS110/IS902 family                             |
| PF05532               | CsbD-like                                                        |
| PF02653               | amino acid or sugar ABC transport systems, permease protein      |
| PF06144               | DNA polymerase III, delta subunit                                |
| PF00420               | NADH-ubiquinone/plastoquinone oxidoreductase chain 4L            |
| PF00115               | Cytochrome C and Quinol oxidase polypeptide I                    |
| PF02464               | competence/damage-inducible protein CinA                         |
| PF00437               | Type II/IV secretion system protein                              |
| PF00528               | ABC transporter, permease protein                                |
| PF07238               | Type IV pilus assembly protein PilZ                              |
| PF00589               | site-specific recombinase, phage integrase family                |
| PF01551               | M23 peptidase domain protein                                     |
| PF03180               | NLPA lipoprotein                                                 |
| PF00196               | transcriptional regulator, LuxR family                           |
| PF00563               | cyclic diguanylate phosphodiesterase                             |
| PF01022               | transcriptional regulator, ArsR family                           |
| PF01032               | ABC transporter, iron chelate uptake transporter                 |
| PF03992               | antibiotic biosynthesis monooxygenase                            |
| PF03591               | AzIC protein                                                     |
| PF04324               | BFD-like [2Fe-2S] binding domain                                 |
| PF02788               | Ribulose bisphosphate carboxylase large chain, N-terminal domain |
| PF01037               | transcriptional regulator, AsnC family                           |
| PF04453               | Organic solvent tolerance protein                                |
| PF02634               | FdhD/NarQ family                                                 |
| PF00329               | Respiratory-chain NADH dehydrogenase, 30 Kd subunit              |
| PF02496               | ABA/WDS induced protein                                          |
| PF05405               | Mitochondrial ATP synthase B chain precursor                     |
| PF00421               | Photosystem II protein                                           |
| PF04506               | Rft protein                                                      |
| PF03831               | PhnA protein                                                     |
| PF07730               | Histidine kinase                                                 |
| PF03354               | phage terminase, large subunit, putative                         |
| PF03466               | LysR substrate binding domain                                    |
| PF01618               | transporter, MotA/TolQ/ExbB proton channel family                |
| PF03732               | Retrotransposon gag protein                                      |
| PF04865               | baseplate J-like protein                                         |
| PF03544               | Gram-negative bacterial tonB protein                             |
| PF00381               | PTS HPr component phosphorylation site                           |
| PF06912               | Protein of unknown function                                      |
| PF07702               | UbiC transcription regulator-associated                          |
| PF01276               | Orn/Lys/Arg decarboxylase, major domain                          |
| PF07244               | Surface antigen variable number repeat                           |
| PF05157               | GSPII_E N-terminal domain                                        |
| PF01614               | transcriptional regulator, IclR family, C-terminal domain        |
| PF05995               | Cysteine dioxygenase type I                                      |
| PF00239               | Resolvase, N terminal domain                                     |
| PF00015               | Methyl-accepting chemotaxis protein                              |
| PF00264               | Common central domain of tyrosinase                              |

PF04350 Pilus assembly protein, PilO  
 PF00223 Photosystem I psaA and psaB proteins  
 PF03776 Septum formation topological specificity factor MinE  
 PF03401 Bordetella uptake gene  
 PF00593 TonB-dependent receptor  
 PF01638 putative transcriptional regulator  
 PF07498 Rho termination factor, N-terminal domain  
 PF00158 Sigma-54 interaction domain  
 PF02515 CAIB/BAIF family  
 PF00665 Integrase core domain  
 PF06803 Protein of unknown function  
 PF02205 WH2 motif  
 PF02954 transcriptional regulator, Fis family  
 PF00440 transcriptional regulator, TetR family  
 PF03527 RHS protein  
 PF02659 Domain of unknown function DUF  
 PF03929 PepSY-associated TM helix  
 PF02687 efflux ABC transporter, permease protein  
 PF02049 flagellar hook-basal body complex protein FliE  
 PF03711 Orn/Lys/Arg decarboxylase, C-terminal domain  
 PF05137 Fimbrial assembly protein  
 PF00990 GGDEF domain  
 PF04481 Protein of unknown function  
 PF02322 Cytochrome oxidase subunit II  
 PF00161 Ribosome inactivating protein  
 PF03616 Sodium/glutamate symporter  
 PF07080 Protein of unknown function  
 PF01702 Queuine tRNA-ribosyltransferase  
 PF02129 X-Pro dipeptidyl-peptidase  
 PF06250 Protein of unknown function  
 PF01558 2-oxoacid:ferredoxin/ flavodoxin oxidoreductases, gamma subunit  
 PF06429 Domain of unknown function  
 PF07196 Flagellin hook IN motif  
 PF07660 Secretin and TonB N terminus short domain  
 PF02655 Domain of unknown function DUF201  
 PF01514 Secretory protein of YscJ/FliF family  
 PF00881 nitroreductase family protein  
 PF00263 Bacterial type II and III secretion system protein  
 PF02311 AraC-like ligand binding domain  
 PF00668 Condensation domain  
 PF07729 FCD domain  
 PF01584 CheW-like domain  
 PF07715 TonB-dependent receptor plug domain  
 PF03958 Bacterial type II/III secretion system short domain  
 PF02321 outer membrane efflux protein  
 PF00267 Gram-negative porin  
 PF02627 carboxymuconolactone decarboxylase family  
 PF01075 Heptosyltransferase  
 PF00905 Penicillin binding protein transpeptidase domain  
 PF02447 GntP family permease  
 PF01594 Domain of unknown function  
 PF06838 aluminium resistance protein  
 PF03928 Domain of unknown function  
 PF05951 Bacterial protein of unknown function  
 PF02417 Chromate transporter  
 PF04932 O-antigen polymerase

PF01527 transposase  
 PF00165 transcriptional regulator, AraC family  
 PF03315 Serine dehydratase beta chain  
 PF00356 transcriptional regulator, lacI family  
 PF01863 Protein of unknown function  
 PF05593 RHS Repeat  
 PF02465 flagellar hook-associated protein 2  
 PF00497 Bacterial extracellular solute-binding proteins, family 3  
 PF07963 Prokaryotic N-terminal methylation motif  
 PF00376 transcriptional regulator, MerR family  
 PF01272 Prokaryotic transcription elongation factor, GreA/GreB, C-terminal domain  
 PF00486 Transcriptional regulatory protein, C terminal  
 PF05840 Bacteriophage replication gene A protein  
 PF00126 transcriptional regulator, LysR family  
 PF00652 ricin-type beta-trefoil lectin domain  
 PF01526 transposase  
 PF04972 Putative phospholipid-binding domain  
 PF00669 Bacterial flagellin N-terminus  
 PF02472 transport energizing protein, ExbD/ToIR family  
 PF03705 CheR methyltransferase, all-alpha domain  
 PF00124 Photosynthetic reaction center protein  
 PF02308 putative Mg<sup>2+</sup> transporter-C  
 PF01609 Transposase  
 PF01547 Bacterial extracellular solute-binding protein  
 PF01810 translocator protein, LysE family  
 PF00816 H-NS histone family  
 PF00975 Thioesterase domain  
 PF02107 flagellar L-ring protein FlgH  
 PF01970 Integral membrane protein  
 PF07805 HipA-like N-terminal domain  
 PF00392 transcriptional regulator, GntR family  
 PF01047 transcriptional regulator, MarR family  
 PF00771 FHIPEP family  
 PF02392 Ycf4  
 PF00216 DNA-binding protein HU  
 PF00346 Respiratory-chain NADH dehydrogenase, 49 Kd subunit  
 PF01739 CheR methyltransferase, SAM binding domain  
 PF00116 Cytochrome C oxidase subunit II, periplasmic domain  
 PF04979 Protein phosphatase inhibitor 2  
 PF01052 Surface presentation of antigens  
 PF04879 Molybdopterin oxidoreductase Fe4S4 domain  
 PF00482 Bacterial type II secretion system protein F domain  
 PF03743 Bacterial conjugation TrbI-like protein  
 PF00691 OmpA family  
 PF03657 Uncharacterised protein family  
 PF02608 Basic membrane protein  
 PF00529 auxiliary transport protein, membrane fusion protein  
 PF04214 Protein of unknown function, DUF  
 PF04397 LytTr DNA-binding domain  
 PF04773 sigma factor regulatory protein, FecR/PupR family  
 PF01957 Nodulation efficiency protein D  
 PF00672 HAMP domain  
 PF00460 Flagella basal body rod protein  
 PF01081 KDPG and KHG aldolase

**Domains shared by castor bean and *Arabidopsis*:**

| <b>Pfam accession</b> | <b>Description</b>                                  |
|-----------------------|-----------------------------------------------------|
| PF07160               | Protein of unknown function                         |
| PF02445               | Quinolinate synthetase A protein                    |
| PF06108               | Protein of unknown function                         |
| PF05206               | Protein of unknown function                         |
| PF03850               | Transcription factor Tfb4                           |
| PF02757               | YLP motif                                           |
| PF03853               | YjeF-related protein N-terminus                     |
| PF04781               | Protein of unknown function                         |
| PF02091               | glycyl-tRNA synthetase, alpha subunit               |
| PF04616               | glycosyl hydrolase, family 43                       |
| PF07540               | Nucleolar complex-associated protein                |
| PF06876               | Plant self-incompatibility response                 |
| PF00610               | Domain found in Dishevelled, Egl-10, and Pleckstrin |
| PF05462               | Slime mold cyclic AMP receptor                      |
| PF05097               | Protein of unknown function                         |
| PF00708               | acylphosphatase                                     |
| PF00852               | Fucosyl transferase                                 |
| PF07172               | Glycine rich protein family                         |
| PF02551               | Acyl-CoA thioesterase                               |
| PF04615               | Utp14 protein                                       |
| PF06695               | Putative small multi-drug export protein            |
| PF04455               | LOR/SDH bifunctional enzyme conserved region        |
| PF06424               | PRP1 splicing factor, N-terminal                    |
| PF06658               | Protein of unknown function                         |
| PF04931               | DNA polymerase V                                    |
| PF05871               | Eukaryotic protein of unknown function              |
| PF07959               | L-fucokinase                                        |
| PF04547               | Protein of unknown function, DUF590                 |
| PF06862               | Protein of unknown function                         |
| PF01927               | Protein of unknown function                         |
| PF07720               | Tetratricopeptide repeat                            |
| PF06298               | Photosystem II protein Y                            |
| PF07842               | GC-rich sequence DNA-binding factor-like protein    |
| PF05994               | Cytoplasmic Fragile-X interacting family            |
| PF00835               | SNAP-25 family                                      |
| PF05162               | Ribosomal protein L41                               |
| PF04147               | Nop14-like family                                   |
| PF02223               | thymidylate kinase                                  |
| PF00780               | CNH domain                                          |
| PF03343               | SART-1 family                                       |
| PF04855               | SNF5 / SMARCB1 / INI1                               |
| PF04005               | Hus1-like protein                                   |
| PF06246               | Isy1-like splicing family                           |
| PF06549               | Protein of unknown function                         |
| PF06206               | Protein of unknown function                         |
| PF04106               | Autophagy protein Apg5                              |
| PF03439               | Supt5 repeat                                        |
| PF07000               | Protein of unknown function                         |
| PF07823               | Cyclic phosphodiesterase-like protein               |
| PF06963               | Ferroportin1                                        |
| PF08216               | Eukaryotic domain of unknown function               |
| PF03060               | oxidoreductase, 2-nitropropane dioxygenase family   |
| PF07817               | GLE1-like protein                                   |
| PF05799               | Cytochrome c oxidase subunit Vc                     |

|         |                               |
|---------|-------------------------------|
| PF04922 | DIE2/ALG10 family             |
| PF06087 | Tyrosyl-DNA phosphodiesterase |
| PF01197 | ribosomal protein L31         |
| PF02104 | SURF1 family                  |
| PF04780 | Protein of unknown function   |
| PF04136 | Sec34-like family             |
| PF06644 | ATP11 protein                 |
| PF00395 | S-layer homology domain       |
| PF03754 | Domain of unknown function    |
| PF07889 | Protein of unknown function   |

### Domains shared by poplar and *Arabidopsis*:

| Pfam accession | Description                                                |
|----------------|------------------------------------------------------------|
| PF04827        | Protein of unknown function                                |
| PF02237        | Biotin protein ligase C terminal domain                    |
| PF02892        | BED zinc finger                                            |
| PF03164        | SAND protein                                               |
| PF07019        | Rab5-interacting protein                                   |
| PF04048        | Sec8 exocyst complex component specific domain             |
| PF02040        | Arsenical pump membrane protein                            |
| PF02357        | Transcription termination factor nusG                      |
| PF07975        | TFIIH C1-like domain                                       |
| PF06331        | REX1 DNA Repair                                            |
| PF04151        | Bacterial pre-peptidase C-terminal domain                  |
| PF06735        | Protein of unknown function                                |
| PF01634        | ATP phosphoribosyltransferase                              |
| PF04828        | Protein of unknown function                                |
| PF02095        | Extensin-like protein repeat                               |
| PF04418        | Domain of unknown function                                 |
| PF04503        | Single-stranded DNA binding protein, SSDP                  |
| PF03040        | CemA protein                                               |
| PF05251        | Uncharacterised protein family                             |
| PF05176        | ATP10 protein                                              |
| PF01502        | phosphoribosyl-AMP cyclohydrolase                          |
| PF01868        | Domain of unknown function                                 |
| PF04180        | Low temperature viability protein                          |
| PF04128        | Partner of SLD five, PSF2                                  |
| PF05056        | Protein of unknown function                                |
| PF07708        | Tash protein PEST motif                                    |
| PF01786        | Alternative oxidase                                        |
| PF02602        | uroporphyrinogen-III synthase                              |
| PF00146        | NADH dehydrogenase                                         |
| PF02943        | ferredoxin thioredoxin reductase catalytic beta chain      |
| PF04699        | ARP2/3 complex 16 kDa subunit                              |
| PF05493        | ATP synthase subunit H                                     |
| PF04114        | Gaa1-like, GPI transamidase component                      |
| PF03108        | MuDR family transposase                                    |
| PF04050        | Up-frameshift suppressor 2                                 |
| PF04543        | Family of unknown function                                 |
| PF08186        | Wound-inducible basic protein family                       |
| PF00033        | Cytochrome b                                               |
| PF07297        | Dolichol phosphate-mannose biosynthesis regulatory protein |
| PF04359        | Protein of unknown function                                |
| PF05254        | Uncharacterised protein family                             |
| PF05007        | Mannosyltransferase                                        |
| PF03215        | Rad17 cell cycle checkpoint protein                        |

|         |                                                       |
|---------|-------------------------------------------------------|
| PF06859 | Bicoid-interacting protein 3                          |
| PF00507 | NADH-ubiquinone/plastoquinone oxidoreductase, chain 3 |
| PF04172 | LrgB-like family                                      |
| PF02162 | XYPPX repeat                                          |
| PF06155 | Protein of unknown function                           |
| PF02576 | Uncharacterized BCR, YhbC family COG0779              |
| PF05127 | Putative ATPase                                       |
| PF05022 | SRP40, C-terminal domain                              |
| PF04045 | Arp2/3 complex, 34kD subunit p34-Arc                  |
| PF05729 | NACHT domain                                          |

**Supplementary Table 3: Ricin/RCA gene family.** Gene names are composed of the scaffold number followed by the gene model (m) number. The NCBI lucus tags/gene symbols are also shown. Shadings indicate scaffolds with multiple gene family members. No shading indicates scaffolds with only one ricin-like gene.

| Gene model          | NCBI locus   | Scaffold length | Protein length | % identity with Ricin | % identity with RCA | Remarks                               |
|---------------------|--------------|-----------------|----------------|-----------------------|---------------------|---------------------------------------|
| 28842.m000952       | RCOM_0344270 | 550 kbp         | 282            | 41                    | 41                  |                                       |
| 29638.m000512       | RCOM_0544700 | 230 kbp         | 272            | 36                    | 36                  |                                       |
| 29638.m000513       | RCOM_0544810 | 230 kbp         | 271            | 34                    | 35                  |                                       |
| 29791.m000533       | RCOM_0792550 | 250 kbp         | 572            | 56                    | 54                  |                                       |
| 29852.m001982       | RCOM_0940160 | 1.8 Mbp         | 302            | 35                    | 37                  |                                       |
| 29942.m000748       | RCOM_1110780 | 700 kbp         | 301            | 36                    | 37                  |                                       |
| 29942.m000749       | RCOM_1110790 | 700 kbp         | 431            | 40                    | 40                  |                                       |
| 29988.m000125       | RCOM_1180940 | 70 kbp          | 575            | 81                    | 78                  |                                       |
| 29988.m000128       | RCOM_1180970 | 70 kbp          | 203            | 82                    | 82                  |                                       |
| 29988.m000129       | RCOM_1180980 | 70 kbp          | 140            | 68                    | 75                  |                                       |
| 30113.m001449       | RCOM_1403770 | 1.3 Mbp         | 307            | 34                    | 35                  |                                       |
| 36244.m000005       | RCOM_1960510 | 1.4 kbp         | 226            | 52                    | 60                  |                                       |
| 54157.m000007       | RCOM_2105270 | 1.1 kbp         | 120            | 67                    | 67                  |                                       |
| 59846.m000009       | RCOM_2152660 | 1 kbp           | 66             | 57                    | 53                  |                                       |
| 59846.m000010       | RCOM_2152670 | 1 kbp           | 98             | 52                    | 54                  |                                       |
| 60626.m000001       | RCOM_2159610 | 2.2 kbp         | 149            | 100                   | 89                  | 5' missing due to end of scaffold     |
| 60627.m000002       | RCOM_2159710 | 4.5 kbp         | 188            | 100                   | 87                  | 5' missing due to end of scaffold     |
| 60628.m000003       | RCOM_2159810 | 2 kbp           | 420            | 100                   | 89                  | 3' missing due to end of scaffold     |
| <b>60629.m00002</b> | RCOM_2159910 | <b>12 kbp</b>   | <b>577</b>     | <b>100</b>            | <b>89</b>           | <b>Ricin precursor</b>                |
| <b>60637.m00004</b> | RCOM_2160110 | <b>35 kbp</b>   | <b>576</b>     | <b>89</b>             | <b>99</b>           | <b>Agglutinin precursor, putative</b> |
| 60637.m00006        | RCOM_2160120 | 35 kbp          | 584            | 75                    | 73                  |                                       |
| 60638.m00018        | RCOM_2161680 | 120 kbp         | 576            | 84                    | 86                  |                                       |
| 60638.m00019        | RCOM_2160860 | 120 kbp         | 438            | 92                    | 89                  |                                       |
| 60638.m00022        | RCOM_2160650 | 120 kbp         | 304            | 34                    | 35                  |                                       |
| 60638.m00023        | RCOM_2160640 | 120 kbp         | 575            | 83                    | 79                  |                                       |
| 60638.m00025        | RCOM_2160530 | 120 kbp         | 347            | 37                    | 37                  |                                       |
| 60639.m00003        | RCOM_2161880 | 12 kbp          | 188            | 100                   | 87                  | 5' missing due to end of scaffold     |
| 60639.m00004        | RCOM_2161890 | 12 kbp          | 195            | 94                    | 85                  |                                       |



**Supplementary Table 4: Manual annotation of genes involved in the biosynthesis of fatty acids and triacylglycerols.** The automatic annotation of 67 (shown in bold) of the 71 selected gene models was manually updated by expert analysis.

| Gene model    | NCBI locus   | Manual annotation                                                                              |
|---------------|--------------|------------------------------------------------------------------------------------------------|
| 27568.m000266 | RCOM_0040840 | <b>ER glycerol-3-phosphate acyltransferase (GPAT)</b>                                          |
| 27798.m000585 | RCOM_0085190 | <b><math>\alpha</math>-Carboxyltransferase (<math>\alpha</math>-CT) subunit of Het-ACCase,</b> |
| 27810.m000646 | RCOM_0090060 | <b>Lysophosphatidic acid acyltransferase (LPAT); LPAT2 homolog</b>                             |
| 27843.m000160 | RCOM_0097860 | <b>Enoyl-ACP reductase precursor (EAR), EC 1.3.1.9</b>                                         |
| 27985.m000877 | RCOM_0138550 | <b>Stearoyl-ACP desaturase</b>                                                                 |
| 28035.m000362 | RCOM_0146820 | <b>Oleate 12-hydroxylase</b>                                                                   |
| 28350.m000105 | RCOM_0235670 | <b>ER glycerol-phosphate acyltransferase (GPAT)</b>                                            |
| 28455.m000368 | RCOM_0251360 | <b>Ketoacyl-ACP Synthase III (KAS III), EC 2.3.1.41</b>                                        |
| 28890.m000006 | RCOM_0354800 | <b><math>\beta</math>-Carboxyltransferase (<math>\beta</math>-CT) subunit of Het-ACCase</b>    |
| 29489.m000170 | RCOM_0445940 | <b>Phospholipase A2 (cytosolic-type)</b>                                                       |
| 29586.m000620 | RCOM_0468100 | Phosphatidic acid phosphatase, putative                                                        |
| 29613.m000358 | RCOM_0503360 | <b>Omega-6 desaturase, endoplasmic reticulum</b>                                               |
| 29630.m000809 | RCOM_0525570 | <b>Biotin carboxyl carrier protein subunit of of Het-ACCase (BCCP2)</b>                        |
| 29650.m000277 | RCOM_0565650 | <b>Enoyl-ACP reductase</b>                                                                     |
| 29660.m000759 | RCOM_0577200 | Phosphatidic acid phosphatase, putative                                                        |
| 29660.m000760 | RCOM_0577310 | <b>ER Phosphatidate phosphatase (PAP), EC 3.1.3.4</b>                                          |
| 29660.m000782 | RCOM_0577730 | <b>Palmitoyl-acyl carrier protein thioesterase</b>                                             |
| 29681.m001360 | RCOM_0612610 | <b>Omega-3 fatty acid desaturase, endoplasmic reticulum</b>                                    |
| 29682.m000581 | RCOM_0613570 | <b>Type 2 diacylglycerol acyltransferase (DGAT2)</b>                                           |
| 29693.m002034 | RCOM_0633300 | <b>3-Ketoacyl-ACP synthase I (KAS I), EC 2.3.1.41</b>                                          |
| 29706.m001305 | RCOM_0653990 | <b>Phosphatidylcholine:diacylglycerol acyltransferase, EC 2.3.1.158 (PDAT1)</b>                |
| 29726.m003980 | RCOM_0679650 | <b>Acyl carrier protein</b>                                                                    |
| 29736.m002070 | RCOM_0699160 | <b>ER glycerol-3-phosphate acyltransferase (GPAT)</b>                                          |
| 29739.m003654 | RCOM_0708160 | Acyl carrier protein, putative                                                                 |
| 29739.m003711 | RCOM_0710230 | <b>3-Ketoacyl-ACP synthase II (KAS II), EC 2.3.1.41</b>                                        |
| 29747.m001075 | RCOM_0724080 | Phosphatidic acid phosphatase, putative                                                        |
| 29822.m003441 | RCOM_0853360 | <b>ER glycerol-3-phosphate acyltransferase (GPAT)</b>                                          |
| 29827.m002594 | RCOM_0866230 | <b>Acyl-CoA-binding protein</b>                                                                |
| 29840.m000629 | RCOM_0893800 | <b>Phospholipase A2-1 (secretory-type), EC 3.1.1.4 (PLA21)</b>                                 |
| 29841.m002744 | RCOM_0894910 | <b>Palmitoyl-acyl carrier protein thioesterase (FATB)</b>                                      |
| 29841.m002865 | RCOM_0900600 | <b>Phosphatidylcholine diacylglycerol cholinephosphotransferase (PDCT)</b>                     |
| 29842.m003623 | RCOM_0905300 | <b>Phospholipase A2 (cytosolic-type)</b>                                                       |
| 29844.m003365 | RCOM_0914000 | <b>Acyl-CoA synthetase (ACS2)</b>                                                              |
| 29848.m004677 | RCOM_0925410 | <b>Palmitoyl-acyl carrier protein thioesterase (FATB)</b>                                      |
| 29851.m002448 | RCOM_0938140 | <b>Lysophosphatidic acid acyltransferase (LPAT); LPAT5 homolog</b>                             |
| 29851.m002473 | RCOM_0938700 | <b>Acyl CoA synthetase</b>                                                                     |
| 29889.m003411 | RCOM_1004000 | <b>Soluble diacylglycerol acyltransferase/wax synthase</b>                                     |
| 29908.m005991 | RCOM_1033990 | <b>Homomeric acetyl-CoA carboxylase (Hom-ACCase), EC 6.4.1.2</b>                               |
| 29912.m005286 | RCOM_1046030 | <b>Phospholipid:diacylglycerol acyltransferase 1 (PDAT1)</b>                                   |
| 29912.m005373 | RCOM_1047540 | <b>Type 1 diacylglycerol acyltransferase (DGAT1)</b>                                           |
| 29912.m005406 | RCOM_1048160 | <b>Phospholipase A2-3 (secretory-type), EC 3.1.1.4 (PLA23)</b>                                 |
| 29917.m001992 | RCOM_1064090 | <b>Oleosin1</b>                                                                                |
| 29929.m004514 | RCOM_1076810 | <b>Stearoyl-ACP desaturase</b>                                                                 |
| 29929.m004515 | RCOM_1076820 | <b>Stearoyl-ACP desaturase</b>                                                                 |
| 29929.m004560 | RCOM_1077760 | <b>Biotin carboxyl carrier protein subunit of of Het-ACCase (BCCP1)</b>                        |
| 29929.m004732 | RCOM_1081890 | <b>3-Ketoacyl-ACP Reductase (KAR), EC 1.1.1.100</b>                                            |
| 29969.m000267 | RCOM_1151840 | <b>ER glycerol-3-phosphate acyltransferase (GPAT)</b>                                          |
| 29991.m000626 | RCOM_1185660 | <b>Phosphatidylcholine : Diacylglycerol Acyltransferase 2, EC 2.3.1.158 (PDAT2)</b>            |
| 30020.m000203 | RCOM_1238330 | <b>Stearoyl-ACP desaturase</b>                                                                 |
| 30068.m002515 | RCOM_1311820 | <b>3-Ketoacyl-ACP synthase I (KAS I), EC 2.3.1.41</b>                                          |

|                      |              |                                                                    |
|----------------------|--------------|--------------------------------------------------------------------|
| <b>30068.m002660</b> | RCOM_1316770 | <b>Plastidial glycerol-phosphate acyltransferase (GPAT)</b>        |
| <b>30076.m004616</b> | RCOM_1346070 | <b>Acyl-CoA synthetase</b>                                         |
| <b>30113.m001448</b> | RCOM_1403260 | <b>Malonyl-CoA : ACP acyltransferase (MCAAT), EC 2.3.1.39</b>      |
| <b>30122.m000357</b> | RCOM_1419880 | <b>ER glycerol-3-phosphate acyltransferase 9 (GPAT9)</b>           |
| <b>30128.m008670</b> | RCOM_1429400 | <b>Acyl-carrier protein (ACP)</b>                                  |
| <b>30128.m008777</b> | RCOM_1431520 | <b>Acyl-CoA synthetase (ACS4)</b>                                  |
| <b>30138.m003845</b> | RCOM_1464650 | <b>Diacylglycerol cholinephosphotransferase (CPT), EC 2.7.8.2</b>  |
| <b>30142.m000631</b> | RCOM_1478210 | <b>Phospholipase A22, EC 3.1.1.4 (PLA22)</b>                       |
| <b>30147.m013777</b> | RCOM_1506940 | <b>3-Ketoacyl-ACP reductase</b>                                    |
| <b>30147.m014333</b> | RCOM_1502140 | <b>Oleosin2</b>                                                    |
| <b>30147.m014425</b> | RCOM_1504200 | <b>Acyl carrier protein</b>                                        |
| <b>30147.m014468</b> | RCOM_1505510 | <b>Palmitoyl-acyl carrier protein thioesterase (FATB)</b>          |
| <b>30169.m006432</b> | RCOM_1577620 | <b>Lysophosphatidic acid acyltransferase (LPAT); LPAT2 homolog</b> |
| <b>30169.m006433</b> | RCOM_1577630 | <b>Lysophosphatidic acid acyltransferase (LPAT); LPAT2 homolog</b> |
| <b>30170.m013990</b> | RCOM_1593580 | <b>Lysophosphatidic acid acyltransferase (LPAT); LPAT4 homolog</b> |
| <b>30170.m014002</b> | RCOM_1593790 | <b>Lysophosphatidylcholine acyltransferase (LPCAT)-like</b>        |
| <b>30174.m008615</b> | RCOM_1615780 | <b>ER glycerol-3-phosphate acyltransferase (GPAT)</b>              |
| <b>30185.m000954</b> | RCOM_1657380 | <b>Biotin carboxylase subunit (BC) of Het-ACCase</b>               |
| <b>30190.m010831</b> | RCOM_1691890 | <b>Acyl-CoA synthetase (ACS1)</b>                                  |
| <b>30200.m000354</b> | RCOM_1712710 | <b>Hydroxyacyl-ACP Dehydrase (HAD), EC 4.2.1</b>                   |
| <b>30217.m000262</b> | RCOM_1750180 | <b>Acyl-ACP Thioesterase A (FATA), EC 3.1.2.14</b>                 |

**Supplementary Table 5: Putative castor bean resistance genes.** Gene models annotated as disease resistance genes were compiled. Using our automatic gene naming or BLAST matches to known disease resistance proteins, putative disease resistance gene models were grouped in three classes: NBS-LRR (nucleotide binding-leucine-rich repeat), eLRR (extracellular LRR), and dirigent-like. Shadings indicate scaffolds with multiple disease resistance genes. No shading indicates scaffolds with only one disease resistance gene.

| Gene Model    | NCBI locus   | Automatic annotation                                                | Gene class    |
|---------------|--------------|---------------------------------------------------------------------|---------------|
| 27436.m000285 | RCOM_0009540 | Leucine-rich repeat-containing protein, putative                    | NBS-LRR       |
| 27467.m000171 | RCOM_0016080 | Leucine-rich repeat-containing protein, putative                    | NBS-LRR       |
| 27504.m000624 | RCOM_0024370 | Disease resistance protein RPM1, putative                           | NBS-LRR       |
| 27504.m000625 | RCOM_0024480 | Disease resistance protein RPM1, putative                           | NBS-LRR       |
| 27574.m000228 | RCOM_0042270 | Disease resistance response protein, putative                       | dirigent-like |
| 27904.m000211 | RCOM_0108660 | Disease resistance protein RPM1, putative                           | NBS-LRR       |
| 27956.m000355 | RCOM_0127740 | Leucine-rich repeat receptor protein kinase EXS precursor, putative | eLRR          |
| 28226.m000870 | RCOM_0205410 | Leucine-rich repeat transmembrane protein kinase, putative          | eLRR          |
| 28525.m000274 | RCOM_0268610 | TMV resistance protein N, putative                                  | NBS-LRR       |
| 28589.m000049 | RCOM_0280040 | Disease resistance protein RPS2, putative                           | NBS-LRR       |
| 28592.m000278 | RCOM_0280590 | Leucine-rich repeat-containing protein, putative                    | NBS-LRR       |
| 28623.m000397 | RCOM_0292060 | Leucine-rich repeat receptor protein kinase EXS precursor, putative | eLRR          |
| 28966.m000543 | RCOM_0364920 | Leucine-rich repeat-containing protein, putative                    | NBS-LRR       |
| 29168.m000372 | RCOM_0393490 | Disease resistance protein RPM1, putative                           | NBS-LRR       |
| 29222.m000397 | RCOM_0407000 | Disease resistance protein RGA2, putative                           | NBS-LRR       |
| 29222.m000399 | RCOM_0407120 | Leucine-rich repeat-containing protein, putative                    | NBS-LRR       |
| 29577.m000461 | RCOM_0455430 | Disease resistance protein RPH8A, putative                          | NBS-LRR       |
| 29579.m000196 | RCOM_0458060 | Leucine-rich repeat-containing protein, putative                    | NBS-LRR       |
| 29585.m000582 | RCOM_0464860 | Disease resistance protein RPP8, putative                           | NBS-LRR       |
| 29609.m000594 | RCOM_0496700 | Leucine-rich repeat-containing protein, putative                    | NBS-LRR       |
| 29634.m002084 | RCOM_0534550 | Disease resistance protein RGA2, putative                           | NBS-LRR       |
| 29666.m001443 | RCOM_0585380 | Late blight resistance protein R1-A, putative                       | NBS-LRR       |
| 29666.m001444 | RCOM_0585390 | Disease resistance protein RPH8A, putative                          | NBS-LRR       |
| 29666.m001447 | RCOM_0585520 | Disease resistance protein RGA2, putative                           | NBS-LRR       |
| 29666.m001448 | RCOM_0585530 | Disease resistance protein RPS2, putative                           | NBS-LRR       |
| 29676.m001639 | RCOM_0602290 | Disease resistance protein ADR1, putative                           | NBS-LRR       |
| 29676.m001640 | RCOM_0602300 | Leucine-rich repeat-containing protein, putative                    | NBS-LRR       |
| 29690.m000408 | RCOM_0625620 | Leucine-rich repeat-containing protein, putative                    | NBS-LRR       |
| 29693.m002050 | RCOM_0633880 | Leucine-rich repeat transmembrane protein kinase, putative          | eLRR          |
| 29702.m000165 | RCOM_0645130 | Leucine-rich repeat transmembrane protein kinase, putative          | eLRR          |
| 29716.m000299 | RCOM_0662960 | Disease resistance protein RPM1, putative                           | NBS-LRR       |
| 29729.m002285 | RCOM_0687360 | Leucine-rich repeat-containing protein 2, <i>lrrc2</i> , putative   | NBS-LRR       |
| 29736.m002080 | RCOM_0699260 | Leucine-rich repeat-containing protein, putative                    | NBS-LRR       |
| 29736.m002081 | RCOM_0699270 | Leucine-rich repeat-containing protein, putative                    | NBS-LRR       |
| 29756.m000505 | RCOM_0739250 | Disease resistance response protein, putative                       | dirigent-like |
| 29756.m000506 | RCOM_0739360 | Disease resistance response protein, putative                       | dirigent-like |
| 29757.m000712 | RCOM_0740720 | Leucine-rich repeat-containing protein, putative                    | NBS-LRR       |
| 29757.m000737 | RCOM_0742270 | Disease resistance protein RPM1, putative                           | NBS-LRR       |
| 29757.m000746 | RCOM_0742650 | Leucine-rich repeat-containing protein, putative                    | NBS-LRR       |
| 29761.m000426 | RCOM_0751360 | Leucine-rich repeat-containing protein, putative                    | NBS-LRR       |

|               |              |                                                           |               |
|---------------|--------------|-----------------------------------------------------------|---------------|
| 29773.m000283 | RCOM_0768900 | Disease resistance protein RPS2, putative                 | NBS-LRR       |
| 29801.m003130 | RCOM_0812210 | Leucine-rich repeat-containing protein, putative          | NBS-LRR       |
| 29801.m003132 | RCOM_0812230 | Disease resistance protein RPS2, putative                 | NBS-LRR       |
| 29801.m003134 | RCOM_0812250 | Leucine-rich repeat-containing protein, putative          | NBS-LRR       |
| 29805.m001536 | RCOM_0820400 | Leucine-rich repeat-containing protein, putative          | NBS-LRR       |
| 29830.m001440 | RCOM_0873960 | Disease resistance response protein, putative             | dirigent-like |
| 29838.m001641 | RCOM_0884220 | Leucine-rich repeat-containing protein, putative          | NBS-LRR       |
| 29838.m001666 | RCOM_0885080 | Disease resistance protein RPS5, putative                 | NBS-LRR       |
| 29841.m002750 | RCOM_0895260 | Disease resistance protein RPS5, putative                 | NBS-LRR       |
| 29841.m002793 | RCOM_0897880 | Disease resistance protein RFL1, putative                 | NBS-LRR       |
| 29841.m002815 | RCOM_0898290 | Disease resistance protein RFL1, putative                 | NBS-LRR       |
| 29841.m002816 | RCOM_0898300 | Disease resistance protein RPS5, putative                 | NBS-LRR       |
| 29841.m002829 | RCOM_0898840 | Leucine-rich repeat-containing protein, putative          | NBS-LRR       |
| 29841.m002830 | RCOM_0898850 | Disease resistance protein RPS2, putative                 | NBS-LRR       |
| 29841.m002832 | RCOM_0898870 | Disease resistance protein RFL1, putative                 | NBS-LRR       |
| 29841.m002872 | RCOM_0900670 | Disease resistance protein RGA2, putative                 | NBS-LRR       |
| 29841.m002919 | RCOM_0902160 | TMV resistance protein N, putative                        | NBS-LRR       |
| 29872.m000523 | RCOM_0979720 | Disease resistance protein RFL1, putative                 | NBS-LRR       |
| 29872.m000524 | RCOM_0979730 | Disease resistance protein RFL1, putative                 | NBS-LRR       |
| 29889.m003298 | RCOM_1000560 | Disease resistance response protein, putative             | dirigent-like |
| 29904.m002928 | RCOM_1019160 | Leucine-rich repeat-containing protein, putative          | NBS-LRR       |
| 29910.m000950 | RCOM_1045150 | TMV resistance protein N, putative                        | NBS-LRR       |
| 29910.m000957 | RCOM_1045320 | TMV resistance protein N, putative                        | NBS-LRR       |
| 29912.m005378 | RCOM_1047690 | Leucine-rich repeat-containing protein 2, lrrc2, putative | NBS-LRR       |
| 29914.m000195 | RCOM_1055490 | Disease resistance protein RPM1, putative                 | NBS-LRR       |
| 29929.m004539 | RCOM_1077550 | TMV resistance protein N, putative                        | NBS-LRR       |
| 29937.m000198 | RCOM_1098990 | Leucine-rich repeat-containing protein, putative          | NBS-LRR       |
| 29948.m000709 | RCOM_1118640 | Disease resistance protein RGA2, putative                 | NBS-LRR       |
| 29950.m001163 | RCOM_1122050 | Leucine-rich repeat-containing protein, putative          | NBS-LRR       |
| 29990.m000507 | RCOM_1184740 | Leucine-rich repeat-containing protein, putative          | NBS-LRR       |
| 29990.m000508 | RCOM_1184850 | Leucine-rich repeat-containing protein, putative          | NBS-LRR       |
| 29994.m000440 | RCOM_1195490 | Disease resistance protein RPH8A, putative                | NBS-LRR       |
| 30055.m001596 | RCOM_1282160 | Leucine rich repeat containing protein kinase, putative   | eLRR          |
| 30061.m000284 | RCOM_1292200 | Disease resistance protein RGA2, putative                 | NBS-LRR       |
| 30063.m001400 | RCOM_1296800 | Leucine-rich repeat-containing protein, putative          | NBS-LRR       |
| 30063.m001411 | RCOM_1298340 | Disease resistance protein RPS2, putative                 | NBS-LRR       |
| 30063.m001415 | RCOM_1298580 | Leucine-rich repeat-containing protein, putative          | NBS-LRR       |
| 30072.m000956 | RCOM_1321720 | Leucine-rich repeat protein, putative                     | eLRR          |
| 30074.m001350 | RCOM_1329890 | TMV resistance protein N, putative                        | NBS-LRR       |
| 30074.m001357 | RCOM_1330160 | TMV resistance protein N, putative                        | NBS-LRR       |
| 30074.m001359 | RCOM_1330180 | Leucine-rich repeat-containing protein, putative          | NBS-LRR       |
| 30074.m001378 | RCOM_1331470 | Disease resistance protein RPP13, putative                | NBS-LRR       |
| 30074.m001381 | RCOM_1331600 | Disease resistance protein RFL1, putative                 | NBS-LRR       |
| 30074.m001382 | RCOM_1331610 | Disease resistance protein RPS2, putative                 | NBS-LRR       |
| 30074.m001398 | RCOM_1333060 | Leucine-rich repeat-containing protein 2, lrrc2, putative | NBS-LRR       |
| 30074.m001399 | RCOM_1333070 | Disease resistance protein RPM1, putative                 | NBS-LRR       |
| 30110.m000724 | RCOM_1397630 | Leucine-rich repeat-containing protein, putative          | NBS-LRR       |
| 30128.m008658 | RCOM_1429080 | Leucine-rich repeat-containing protein, putative          | NBS-LRR       |
| 30131.m007205 | RCOM_1452690 | Leucine-rich repeat-containing protein, putative          | NBS-LRR       |
| 30131.m007205 | RCOM_1452690 | Disease resistance protein RPM1, putative                 | NBS-LRR       |

|               |              |                                                            |               |
|---------------|--------------|------------------------------------------------------------|---------------|
| 30131.m007209 | RCOM_1452730 | Disease resistance protein RGA2, putative                  | NBS-LRR       |
| 30131.m007215 | RCOM_1452990 | Leucine-rich repeat-containing protein, putative           | NBS-LRR       |
| 30131.m007232 | RCOM_1453360 | Disease resistance protein RPM1, putative                  | NBS-LRR       |
| 30131.m007235 | RCOM_1453390 | Disease resistance protein RGA2, putative                  | NBS-LRR       |
| 30131.m007237 | RCOM_1453510 | Disease resistance protein RPM1, putative                  | NBS-LRR       |
| 30131.m007242 | RCOM_1453660 | Disease resistance response protein, putative              | dirigent-like |
| 30133.m000230 | RCOM_1455020 | Disease resistance response protein, putative              | dirigent-like |
| 30138.m003923 | RCOM_1467510 | Disease resistance response protein, putative              | dirigent-like |
| 30143.m001186 | RCOM_1481570 | Disease resistance protein RPP8, putative                  | NBS-LRR       |
| 30143.m001201 | RCOM_1482430 | Disease resistance protein RPP8, putative                  | NBS-LRR       |
| 30146.m003486 | RCOM_1487620 | Leucine-rich repeat-containing protein, putative           | NBS-LRR       |
| 30147.m013873 | RCOM_1508820 | Leucine-rich repeat-containing protein, putative           | eLRR          |
| 30147.m013889 | RCOM_1509380 | Disease resistance protein RPP13, putative                 | NBS-LRR       |
| 30147.m014532 | RCOM_1506660 | Leucine-rich repeat protein, putative                      | eLRR          |
| 30148.m001423 | RCOM_1516000 | Disease resistance protein RGA2, putative                  | NBS-LRR       |
| 30148.m001424 | RCOM_1516110 | Leucine-rich repeat-containing protein, putative           | NBS-LRR       |
| 30169.m006484 | RCOM_1579060 | Leucine-rich repeat-containing protein, putative           | NBS-LRR       |
| 30170.m013888 | RCOM_1590790 | Disease resistance protein RPP13, putative                 | NBS-LRR       |
| 30170.m013933 | RCOM_1591970 | Leucine-rich repeat-containing protein, putative           | NBS-LRR       |
| 30190.m010961 | RCOM_1678470 | Leucine-rich repeat protein, putative                      | eLRR          |
| 30190.m011021 | RCOM_1680260 | Leucine rich repeat receptor kinase, putative              | eLRR          |
| 30190.m011025 | RCOM_1680500 | Leucine rich repeat receptor kinase, putative              | eLRR          |
| 30190.m011051 | RCOM_1681360 | Leucine-rich repeat-containing protein, putative           | NBS-LRR       |
| 30190.m011052 | RCOM_1681370 | Leucine-rich repeat-containing protein, putative           | NBS-LRR       |
| 30190.m011060 | RCOM_1681450 | Leucine-rich repeat transmembrane protein kinase, putative | eLRR          |
| 30190.m011348 | RCOM_1689510 | Disease resistance response protein, putative              | dirigent-like |
| 30190.m011349 | RCOM_1689520 | Disease resistance response protein, putative              | dirigent-like |
| 30205.m001595 | RCOM_1727110 | Leucine-rich repeat-containing protein, putative           | NBS-LRR       |
| 30226.m002005 | RCOM_1772130 | Disease resistance protein RPP8, putative                  | NBS-LRR       |
| 30710.m000036 | RCOM_1797940 | Disease resistance protein RPH8A, putative                 | NBS-LRR       |
| 36675.m000011 | RCOM_1965050 | Disease resistance response protein, putative              | dirigent-like |

## Supplementary figures

**Supplementary Figure 1: Venn diagram showing Specific and shared protein (Pfam) domains between castor bean, poplar, and *Arabidopsis*.** The castor bean predicted proteome could be matched to over 3,000 protein domains from Pfam, several of which are not present in *Arabidopsis* or poplar, including secondary metabolism genes. A list of shared and specific domains is shown in Supplementary Table 2.

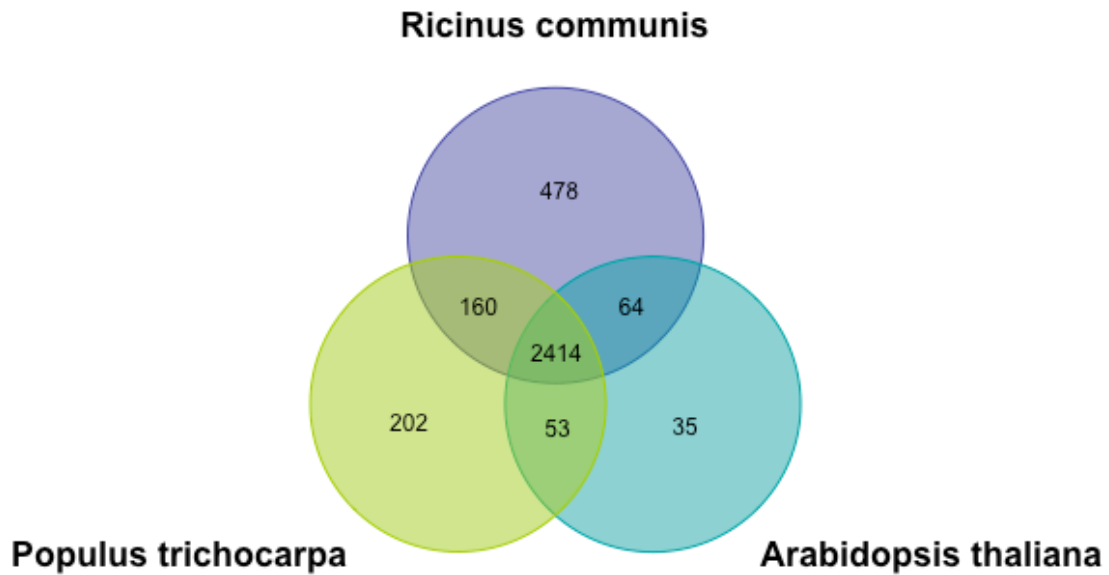

**Supplementary Figure 2: Seventeen paralogous triplicated regions identified in the castor bean genome.** Images generated using Sybil show regions that contain strings of collinear genes in three different scaffolds. The approximate triplicated regions are shown with a red bar under the alignments. The minus sign in parenthesis indicates reverse orientation of the corresponding scaffold.

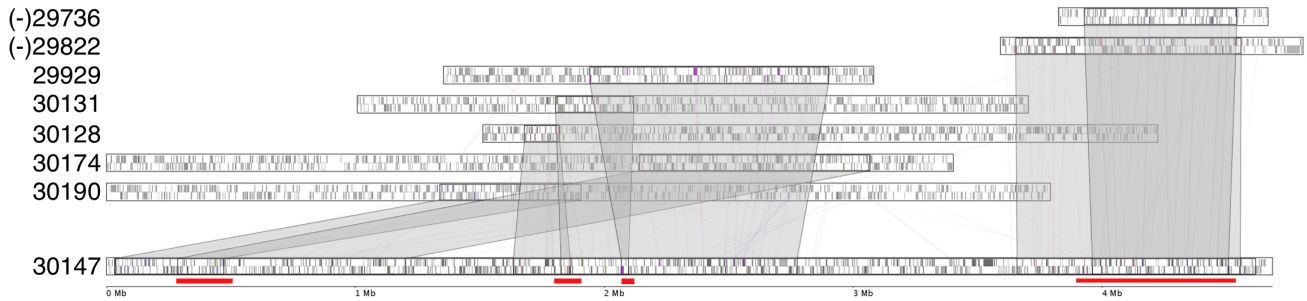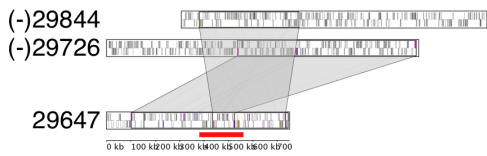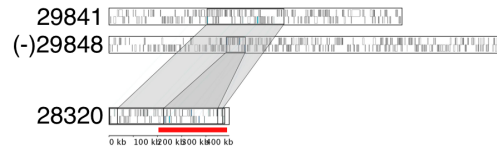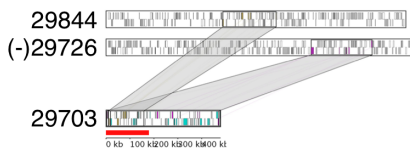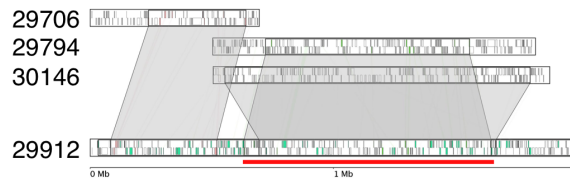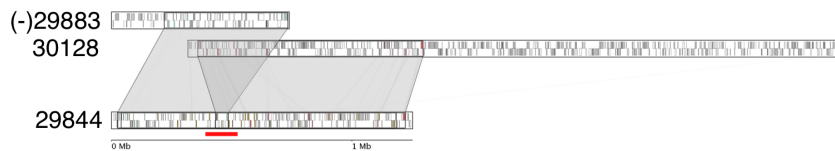

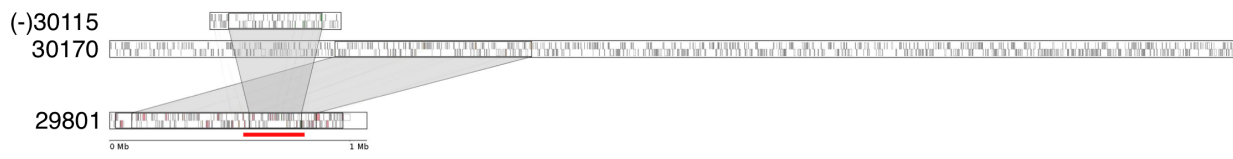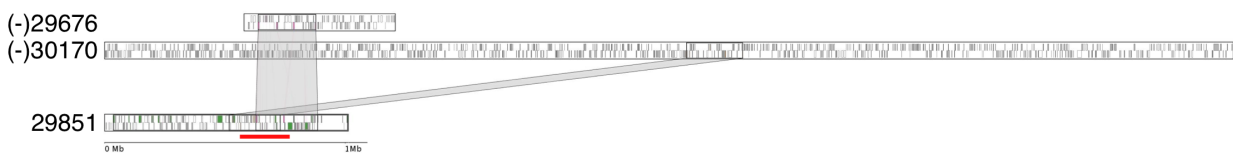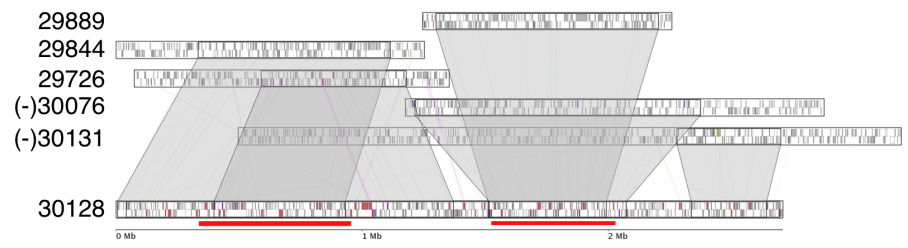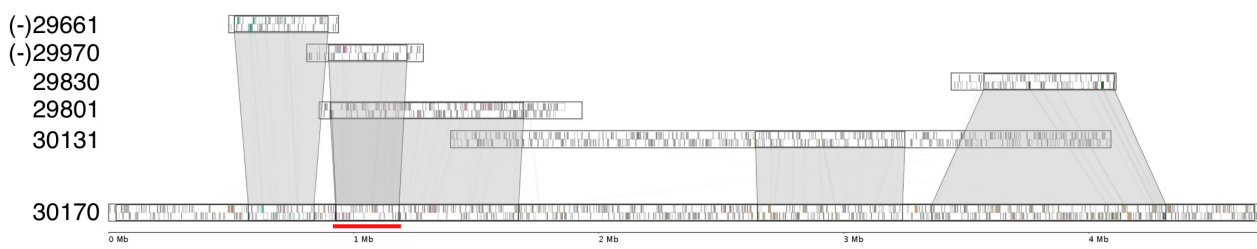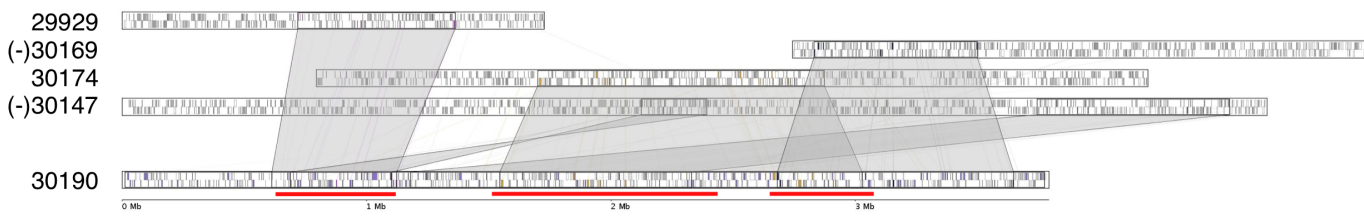



**Supplementary Figure 3: Collinearity between paralogous triplicated castor bean genomic regions and their putative orthologues in other dicot genomes.** In each section, a castor bean triplicated region is shown along with its corresponding putative orthologous regions in poplar, grapevine, *Arabidopsis*, and papaya (see Fig. 2 in main text for details). Different from Figure 2, in these cases, the extension of the castor bean strings of paralogous genes is different in each of the three scaffolds (see Supplementary Fig. 2). In order to be conservative, only the intersection between the paralogous regions is showed as a shaded area. In addition, the projection of the larger paralogous region onto the shorter ones is shown by gray lines (top panels). Two versions of the Circos images of cross-species comparisons are shown (left: considering only the intersection of the three castor bean paralogous regions; right: considering the projections of the longer paralogous regions).

A

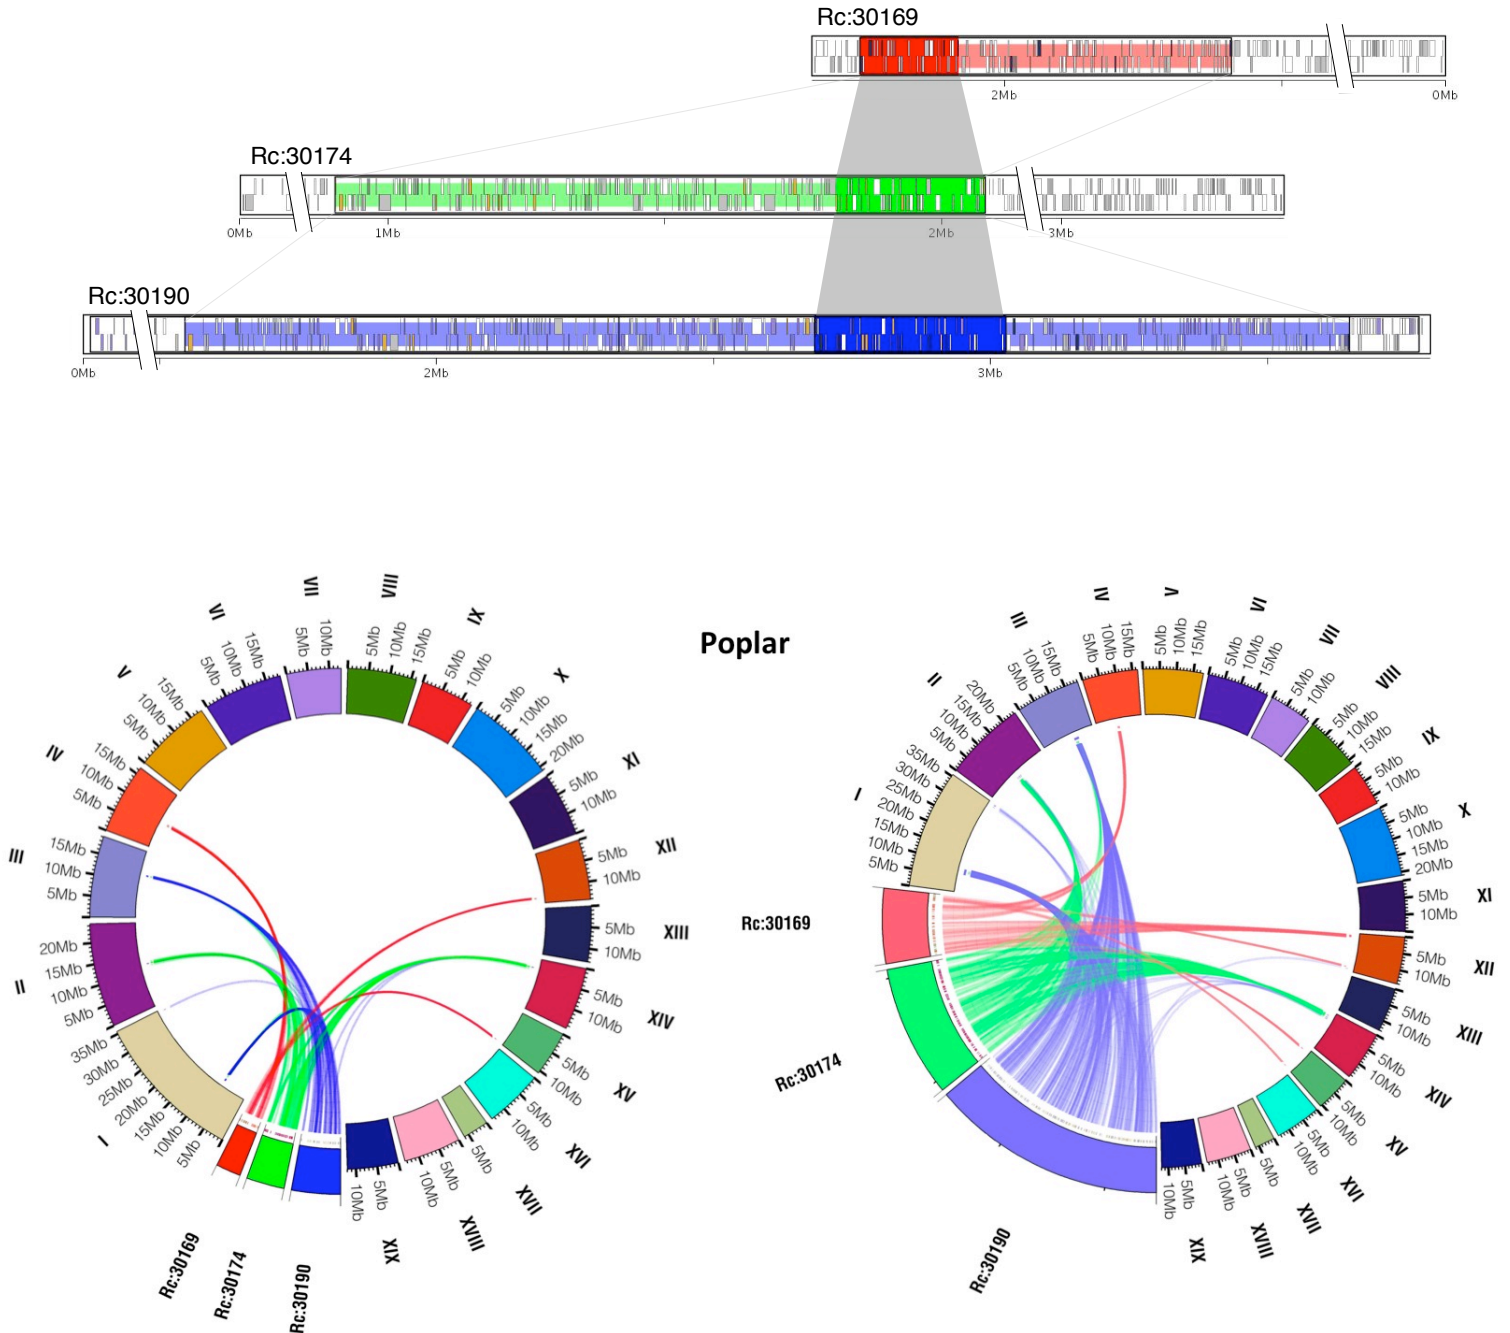

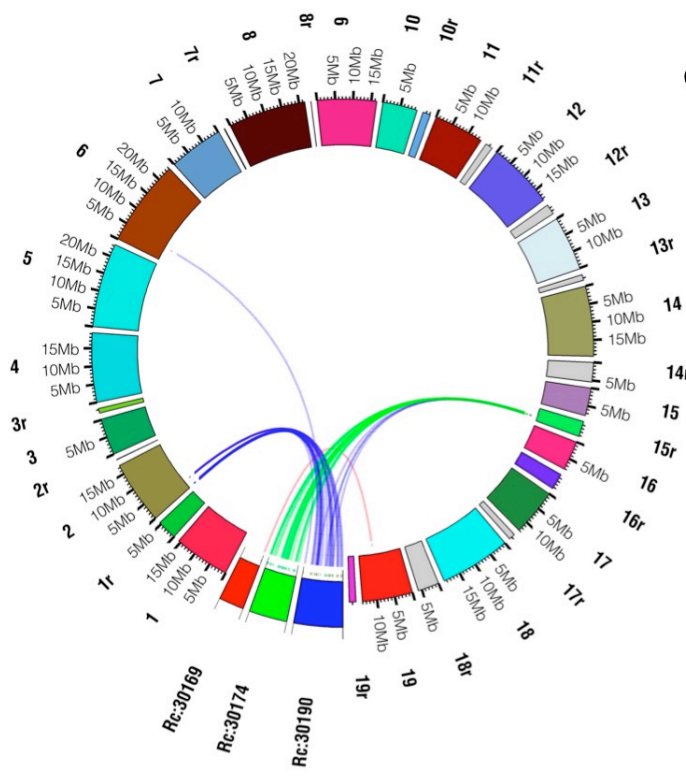

**Grapevine**

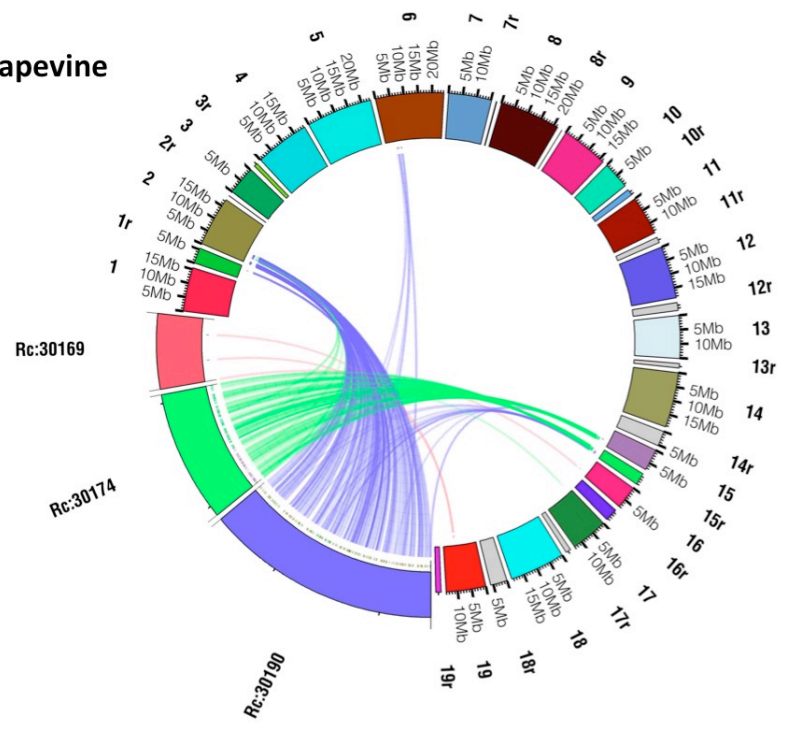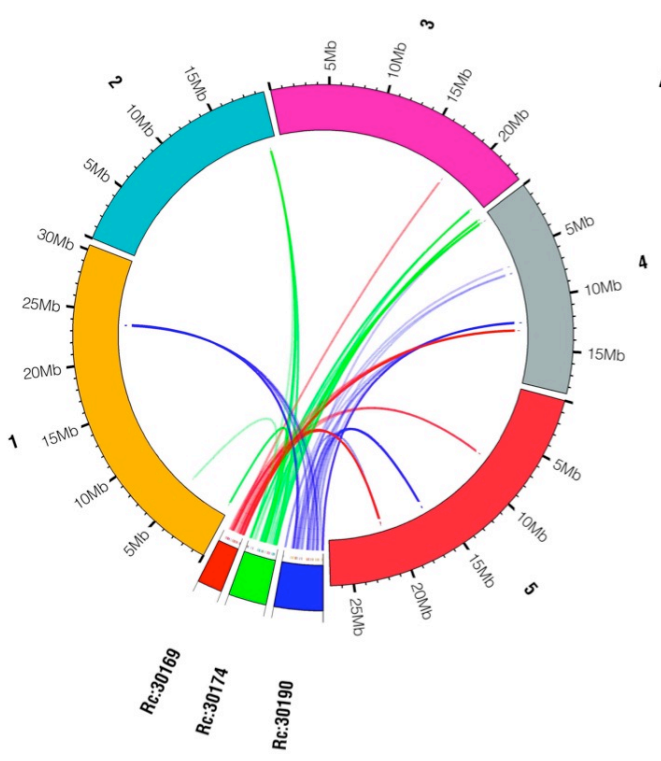

**Arabidopsis**

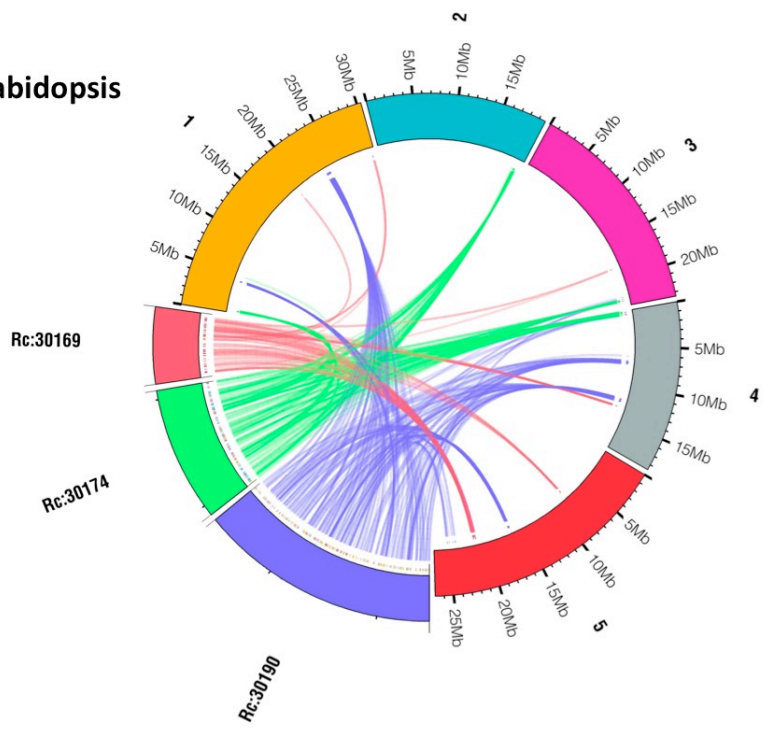

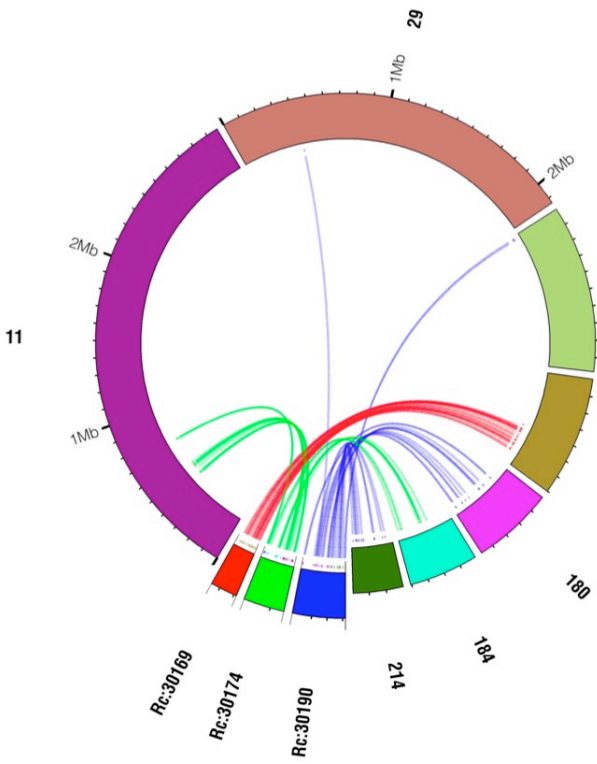

**Papaya**

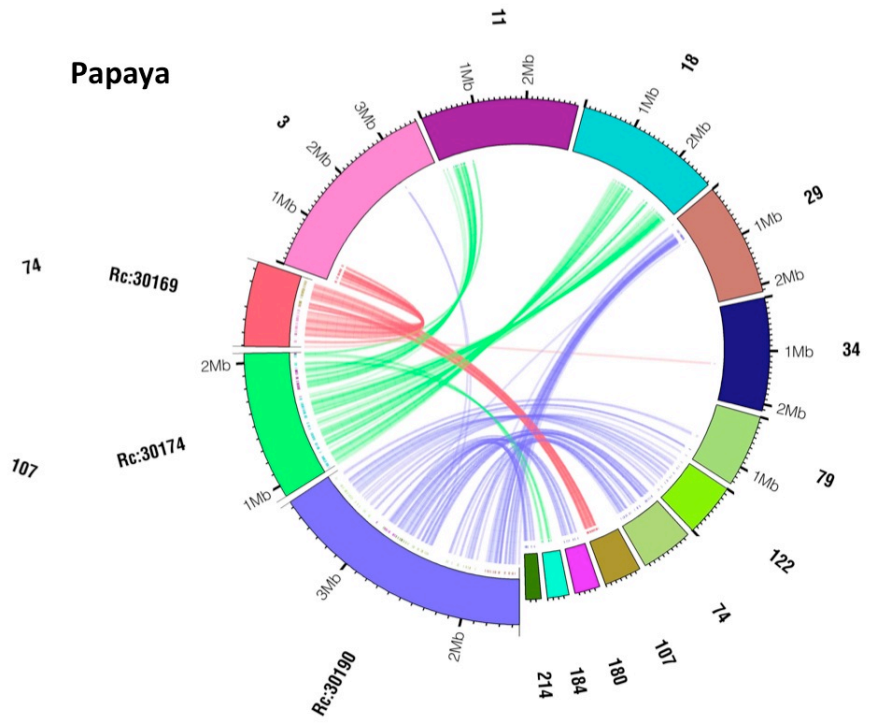

**B**

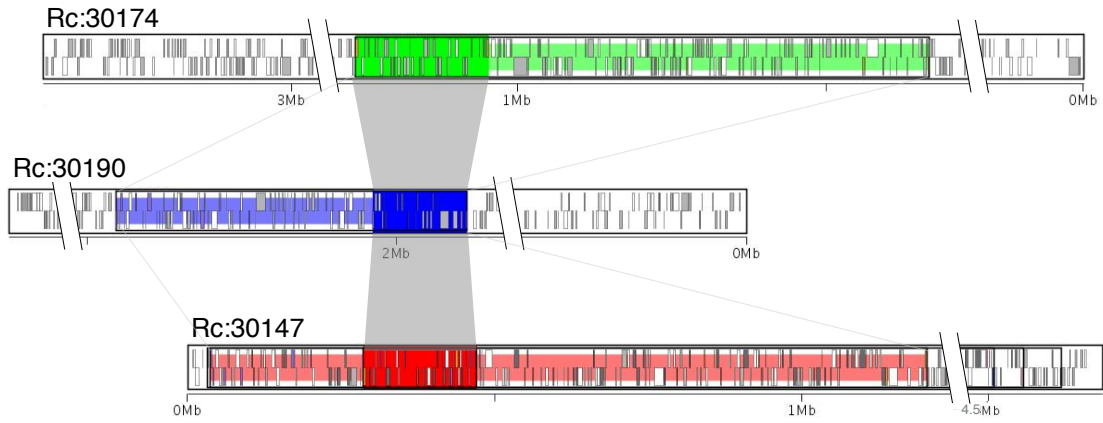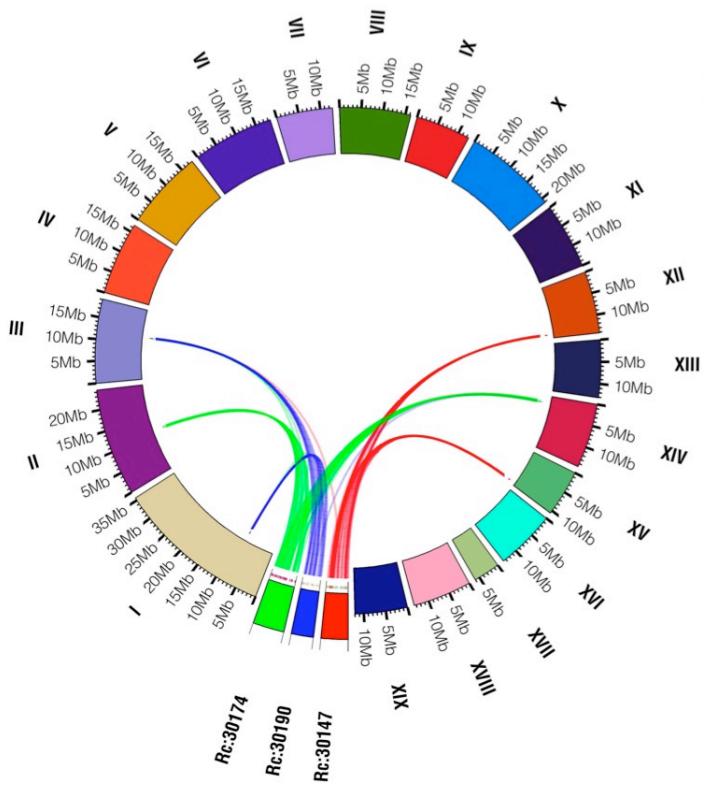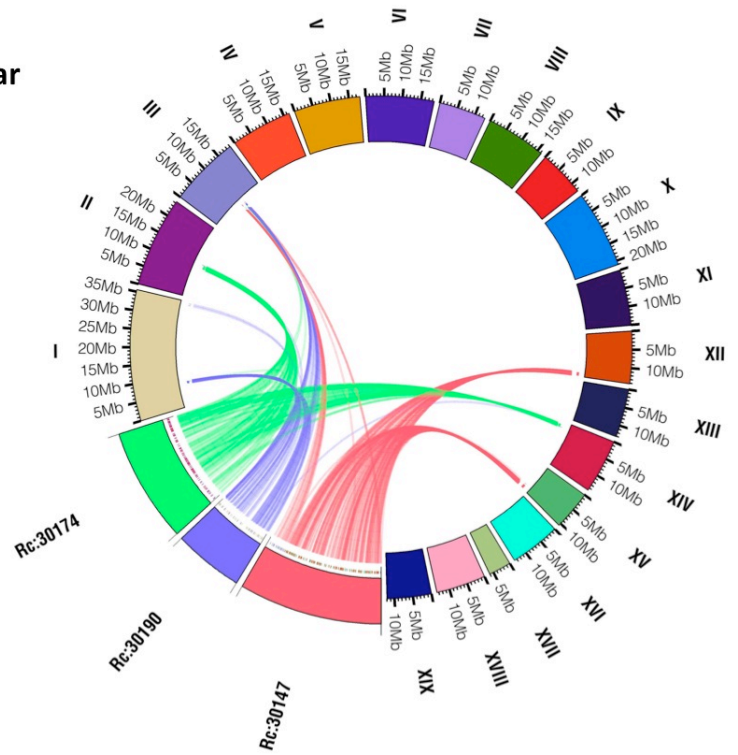



## Grapevine

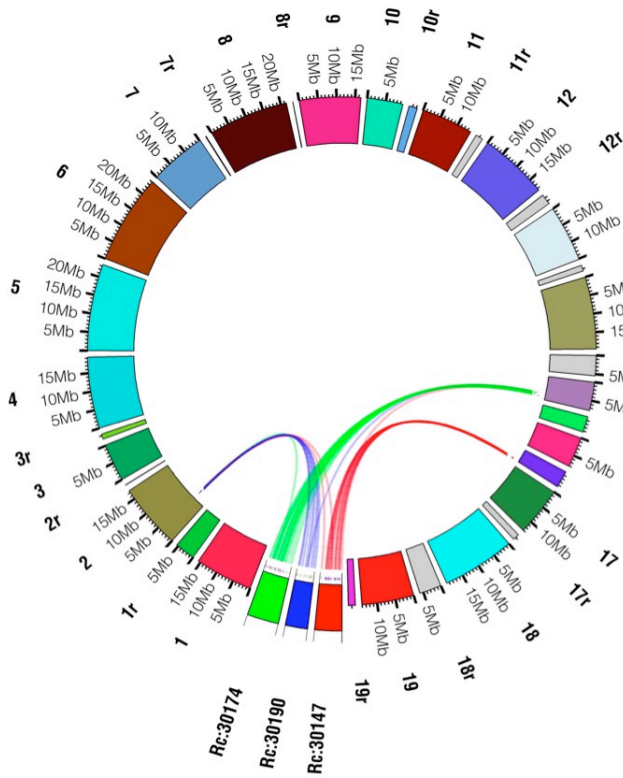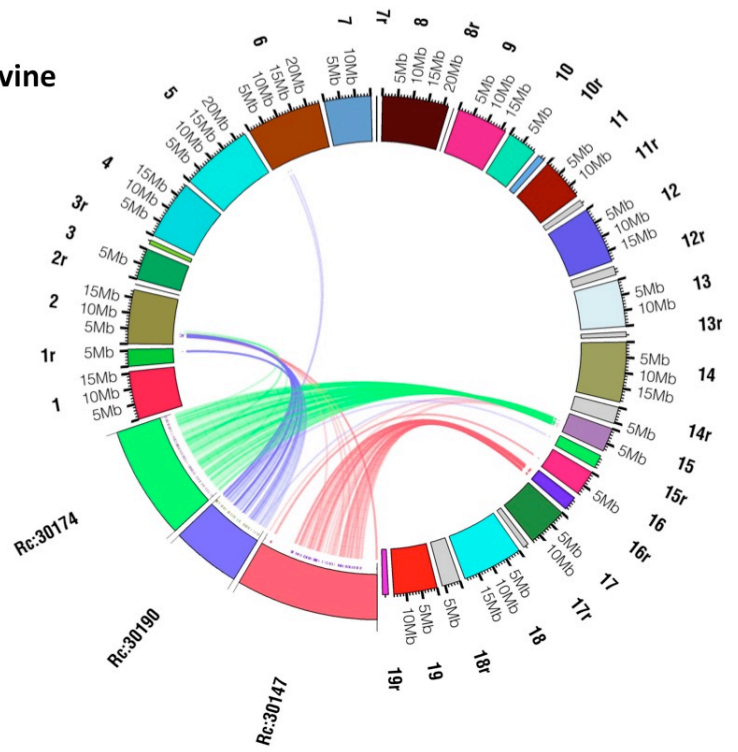

## Arabidopsis

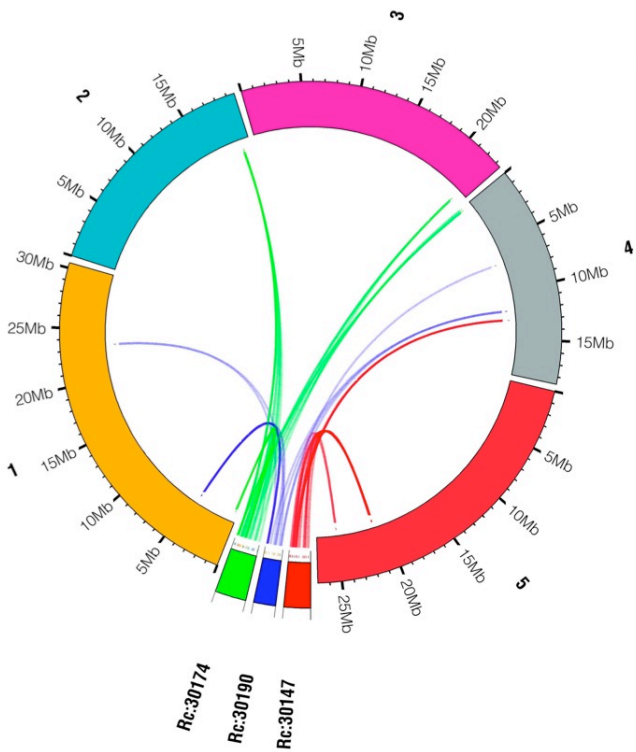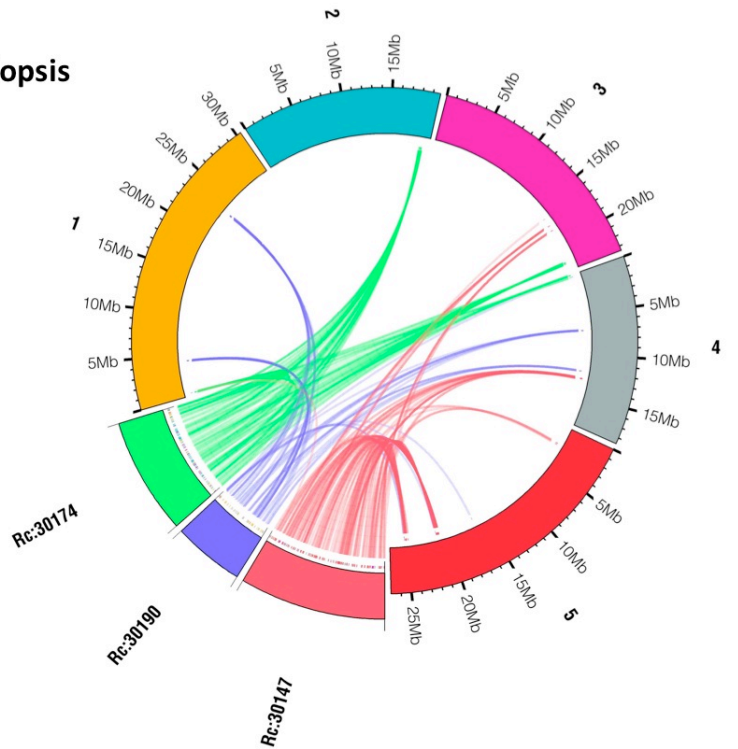

# Papaya

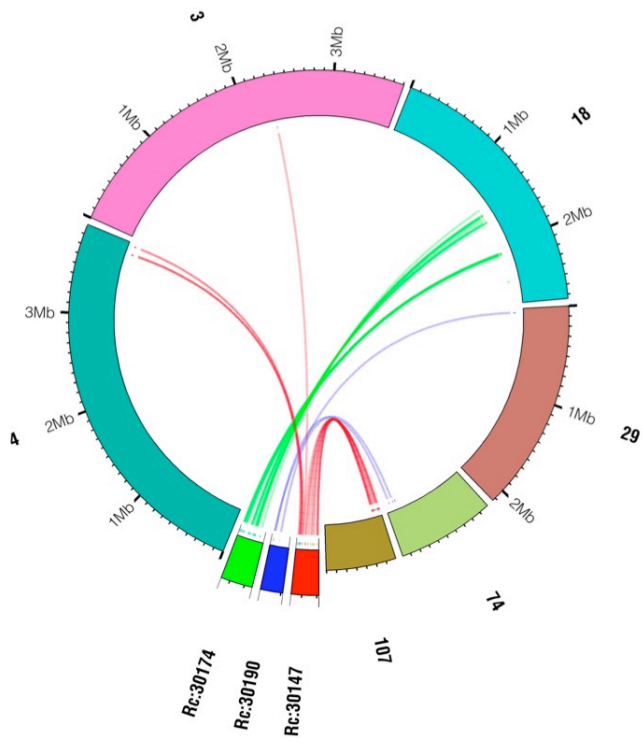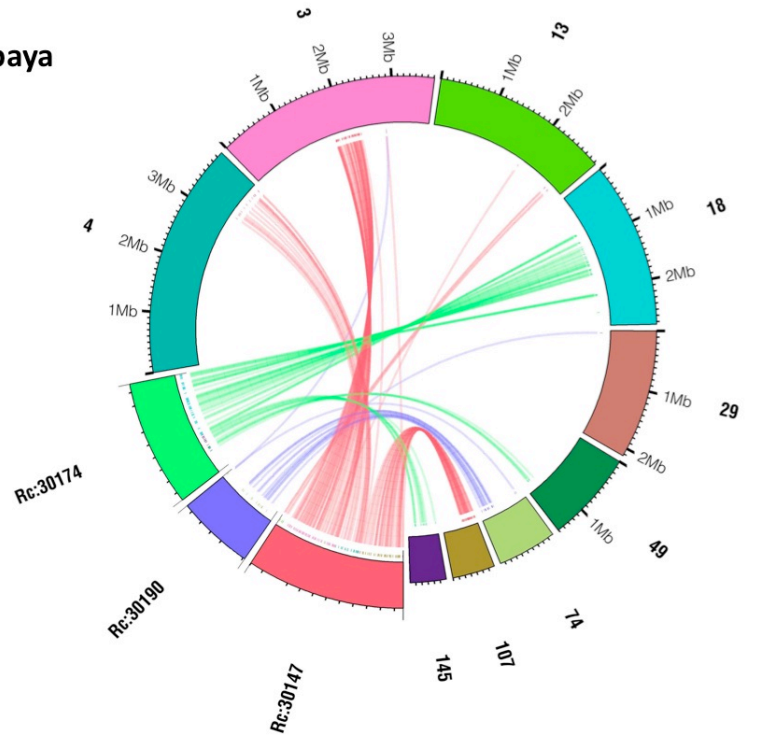

C

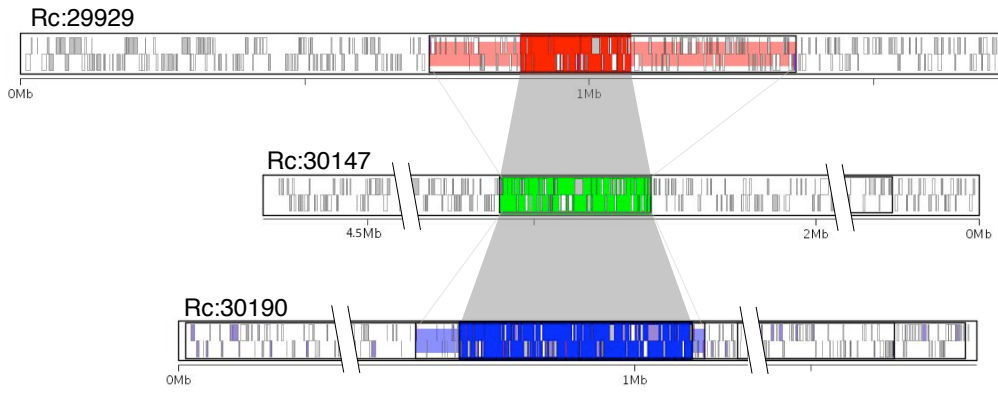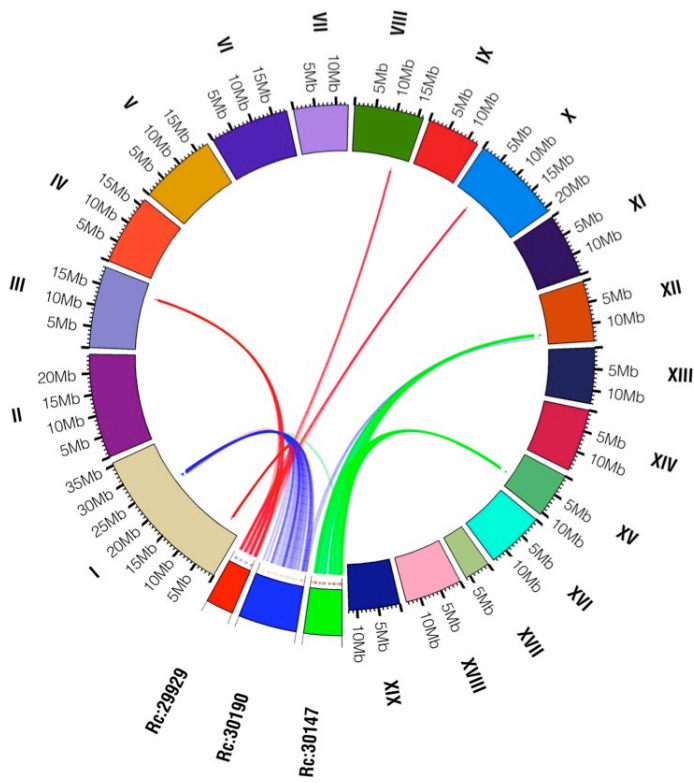

Poplar

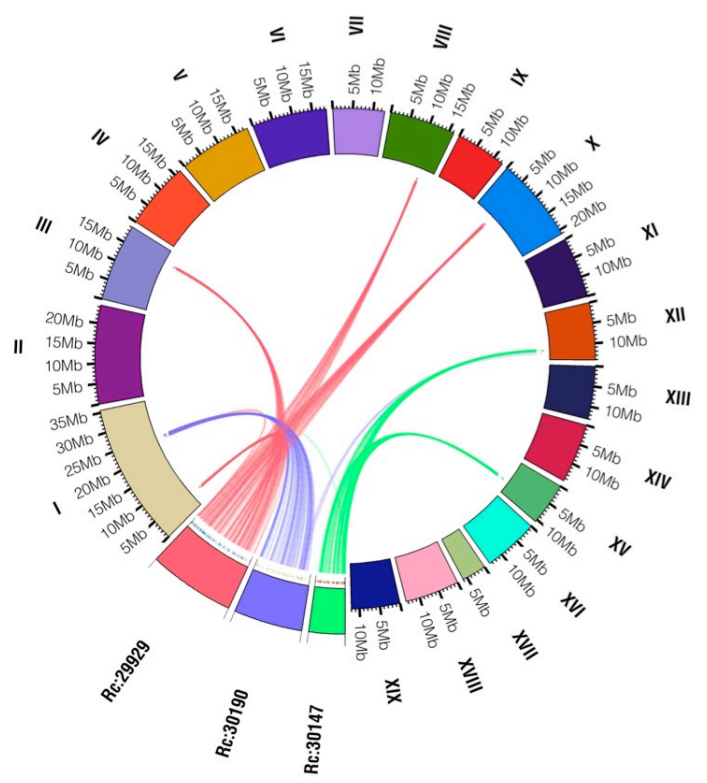

## Grapevine

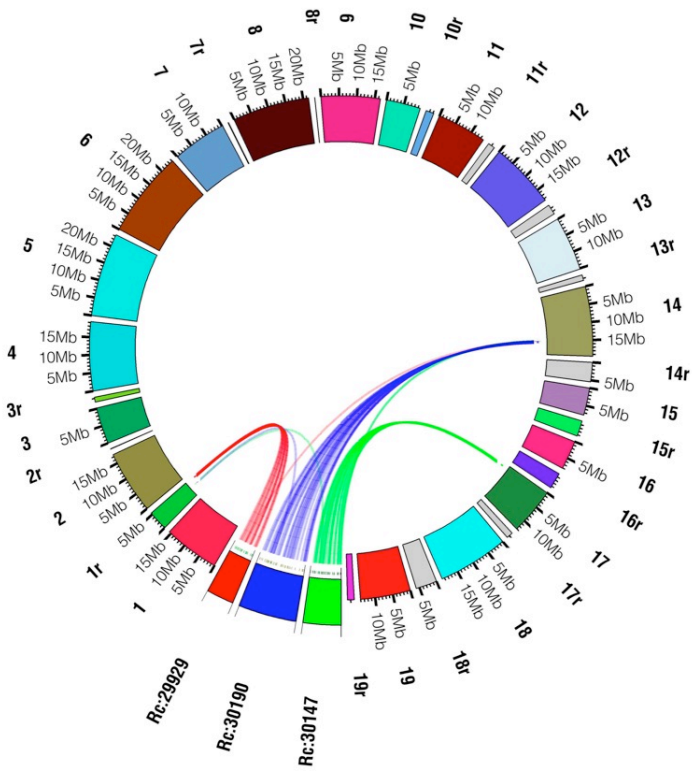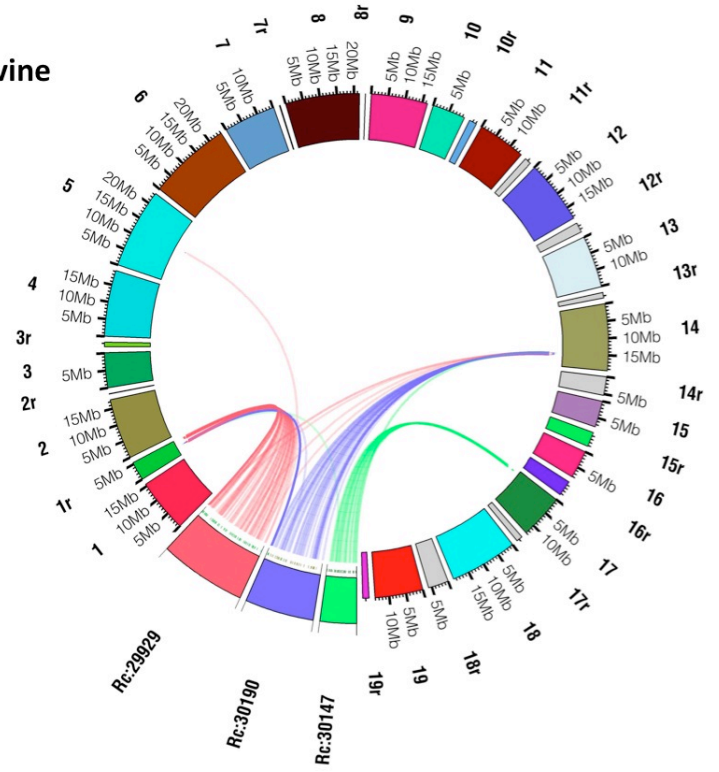

## Arabidopsis

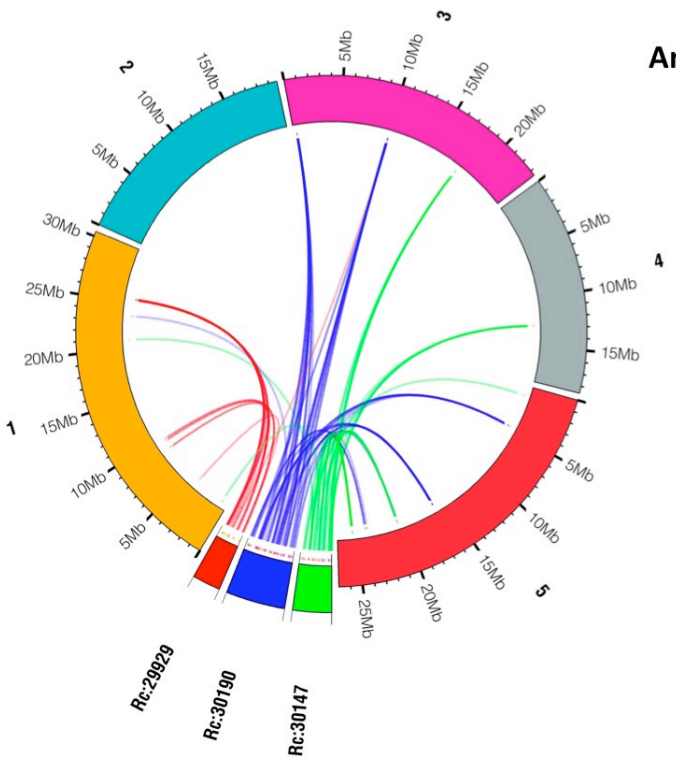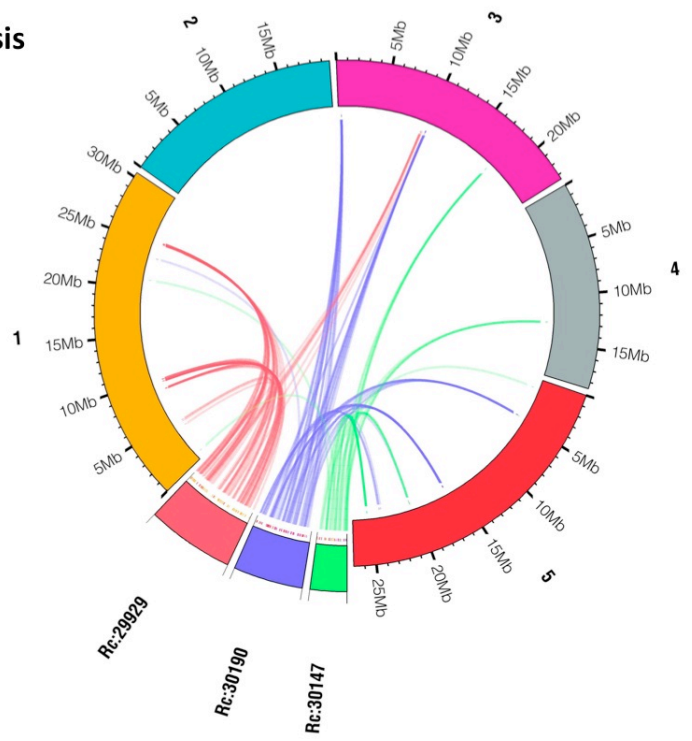





D

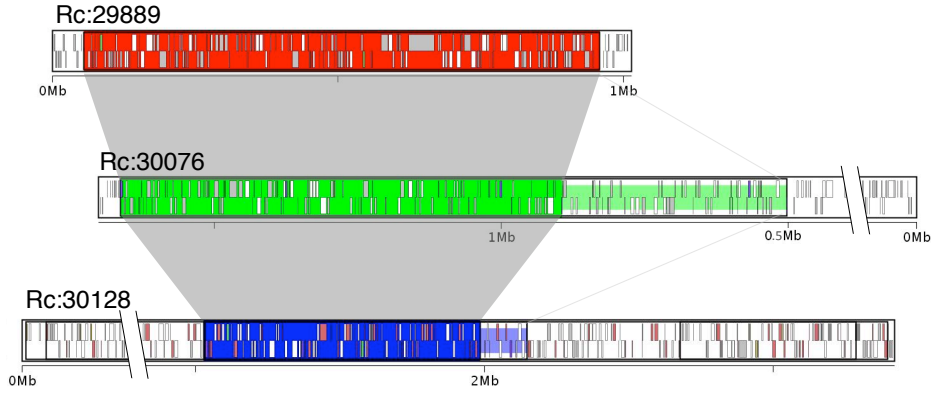

Poplar

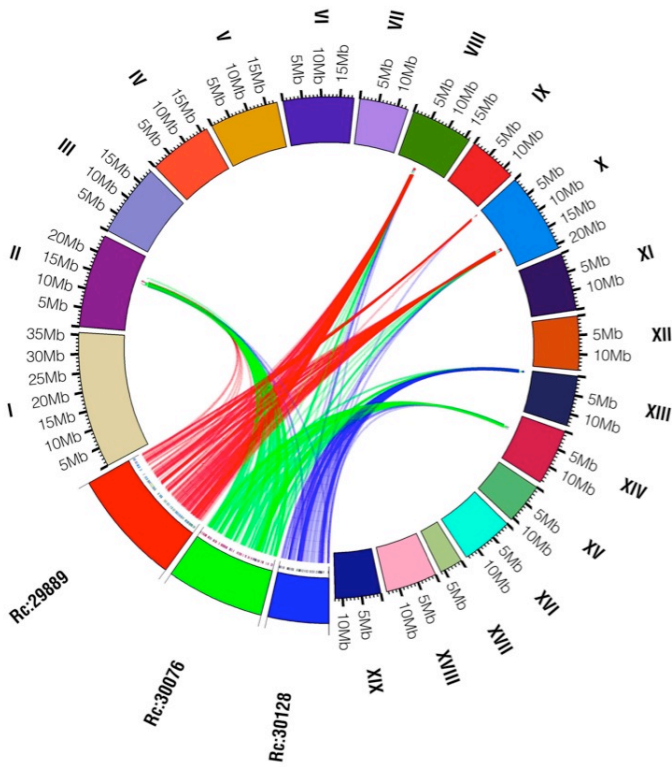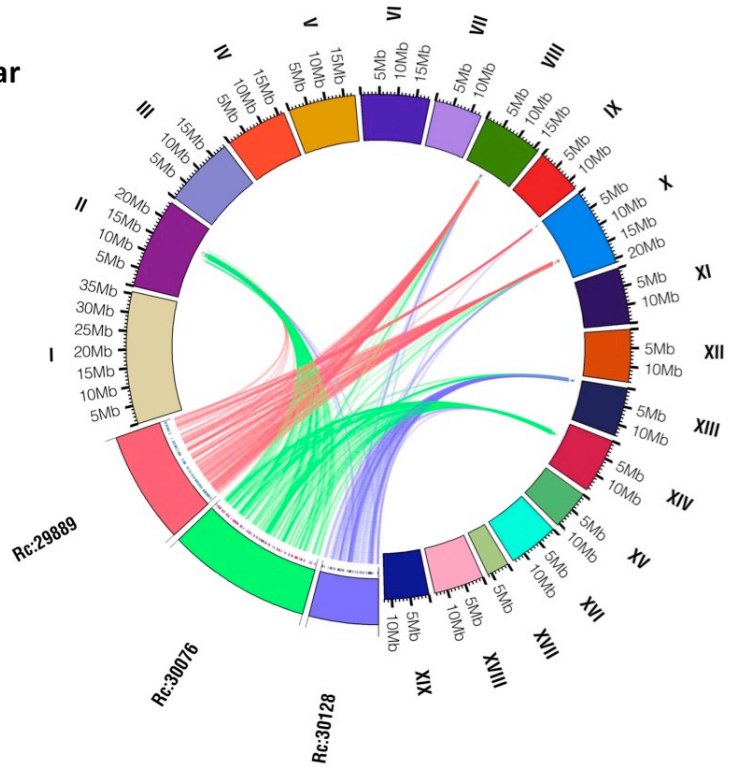

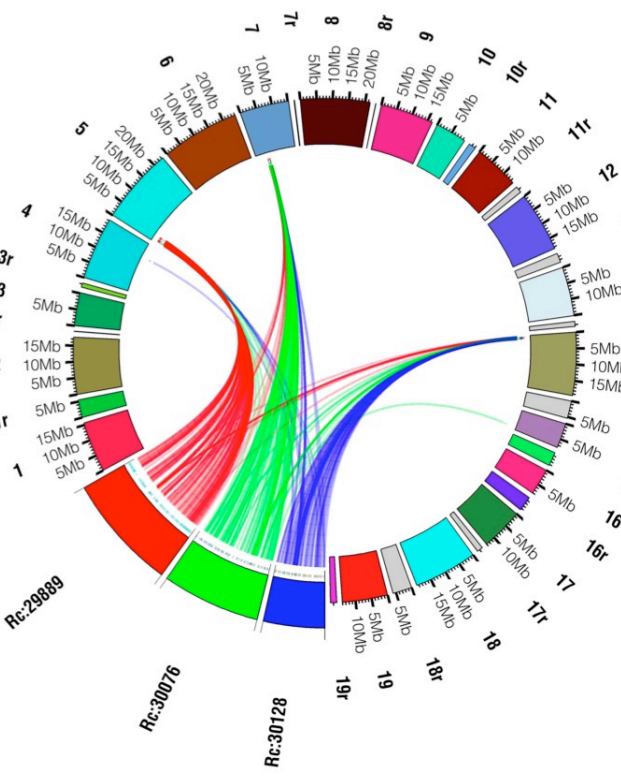

**Grapevine**

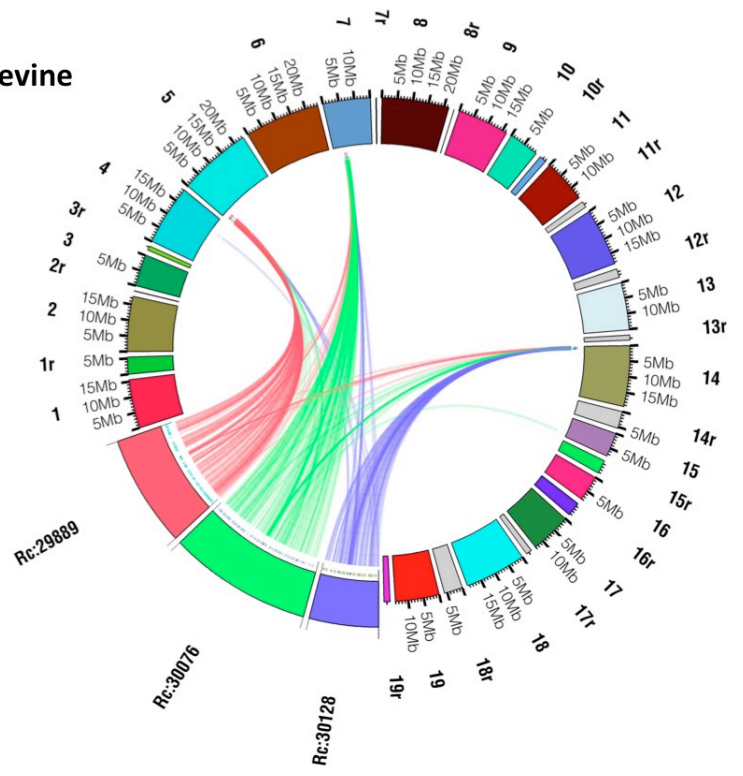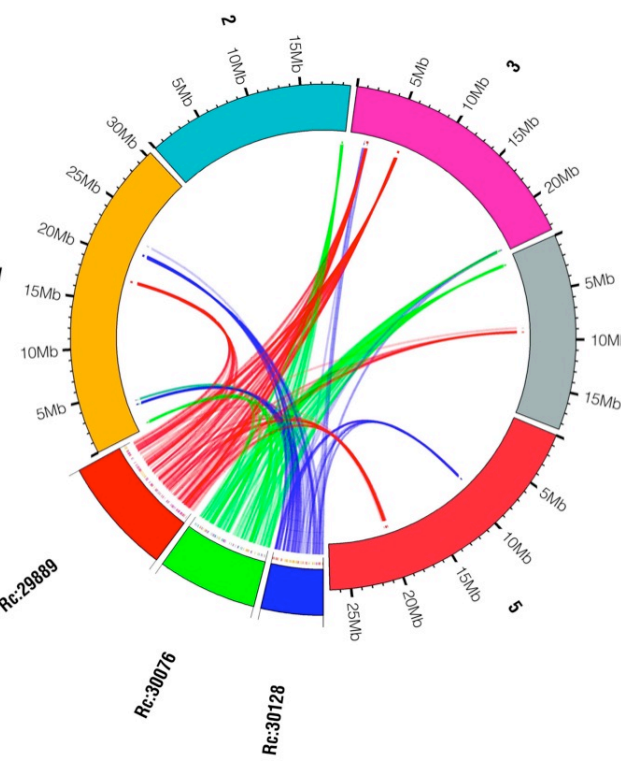

**Arabidopsis**

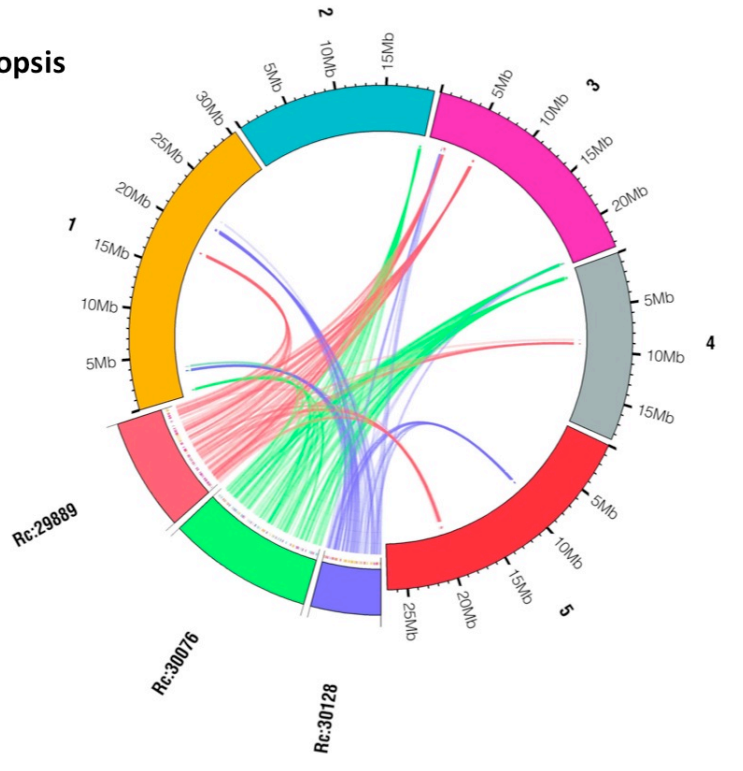

Papaya

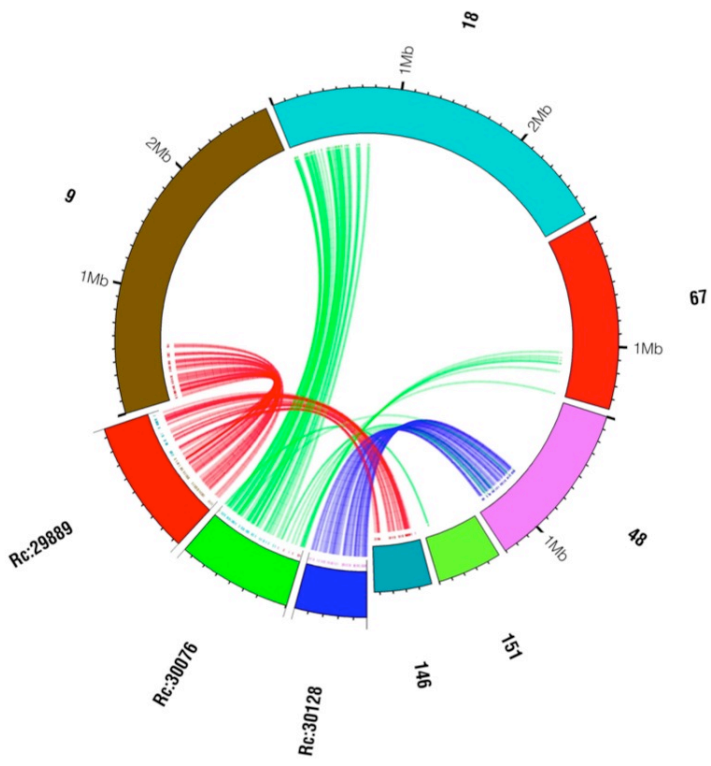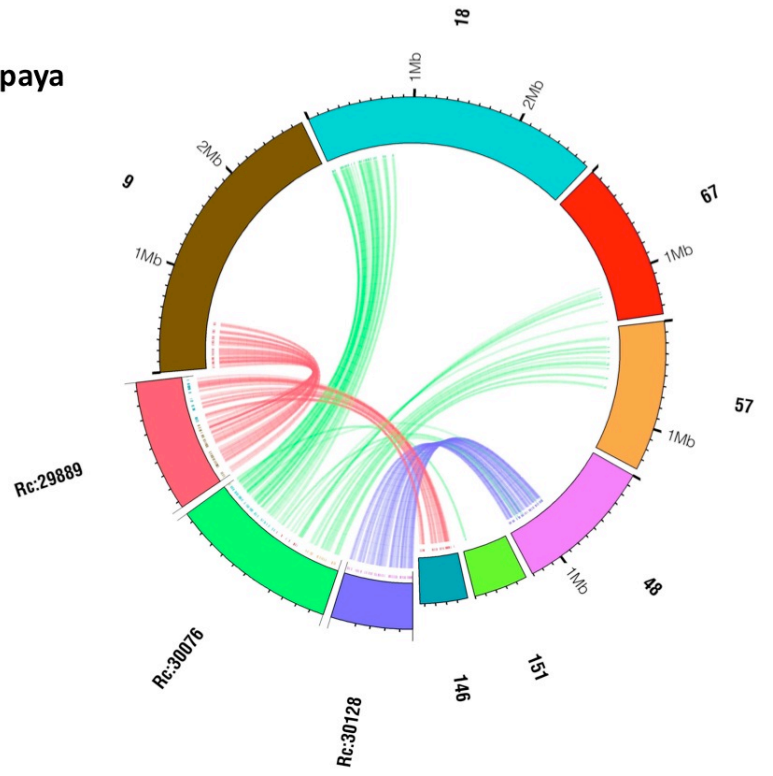



**E**

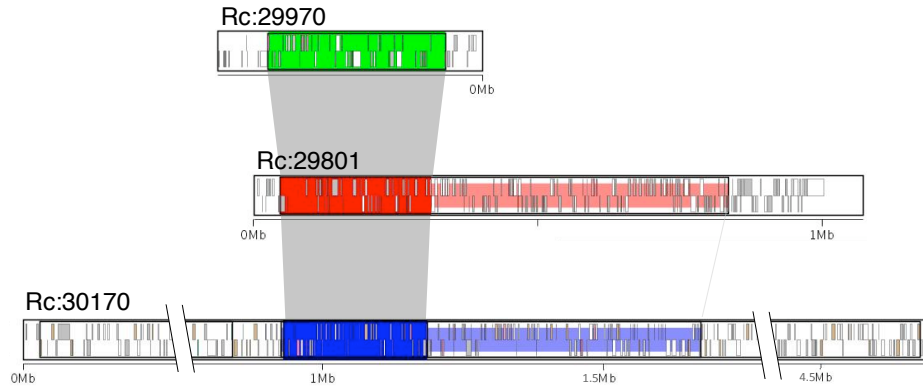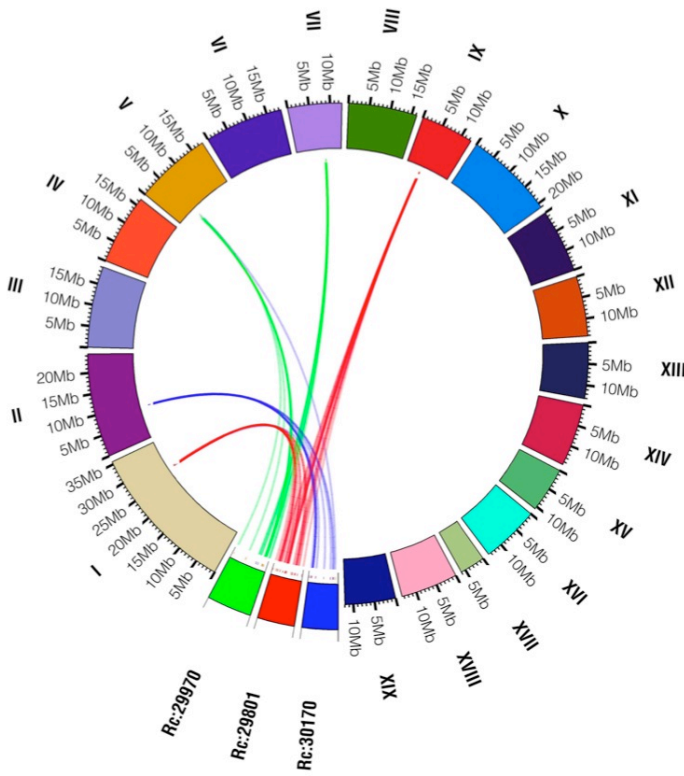

**Poplar**

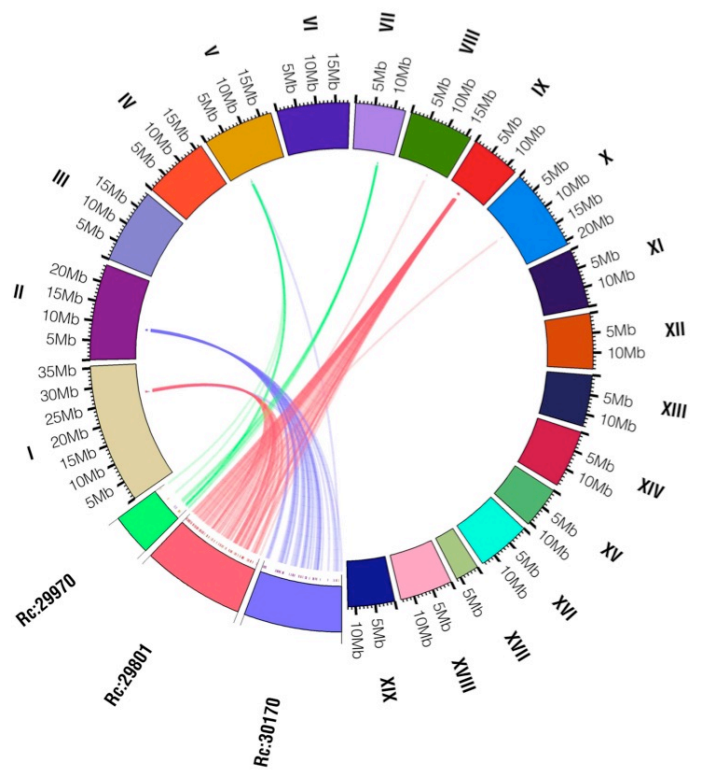

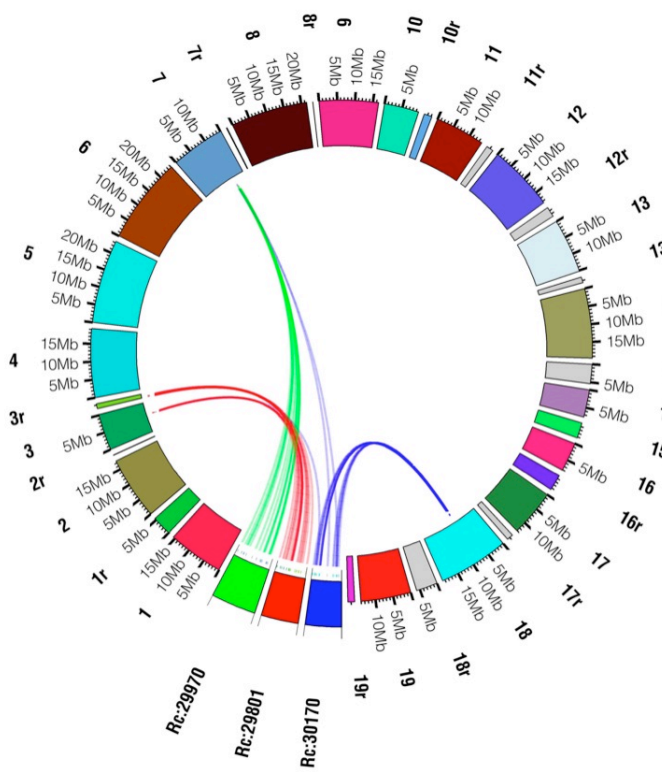

## Grapevine

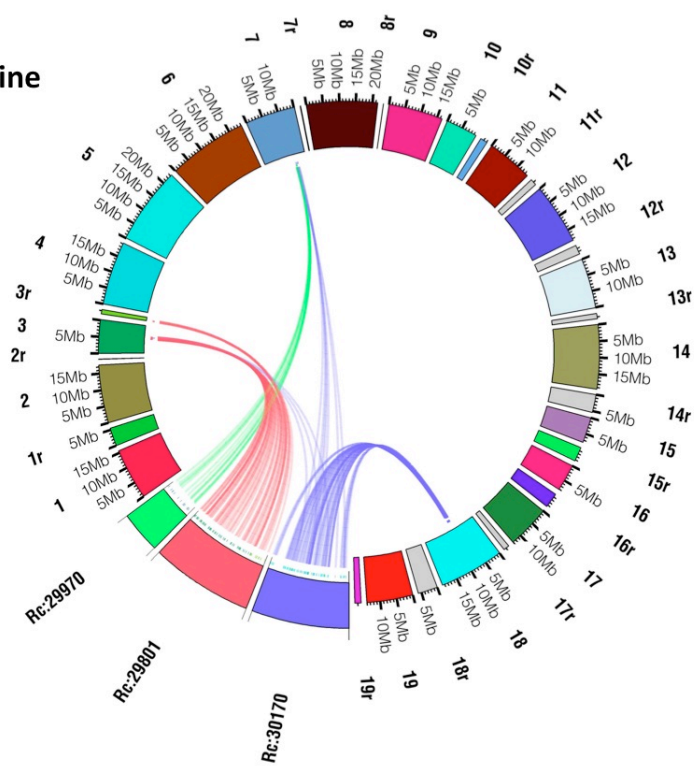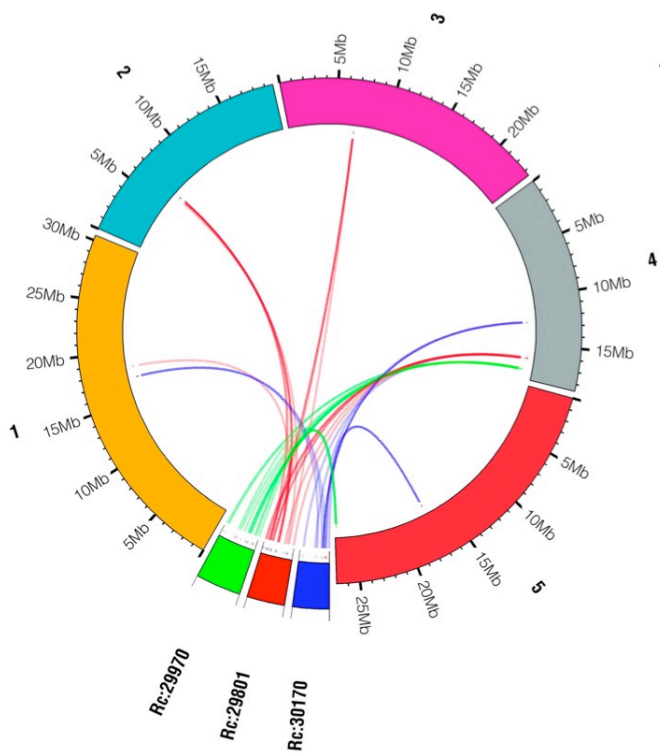

## Arabidopsis

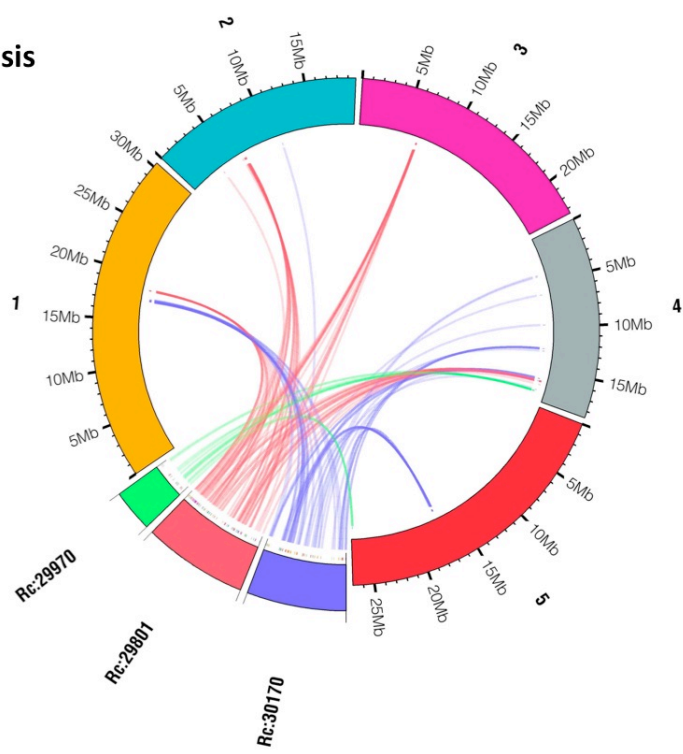

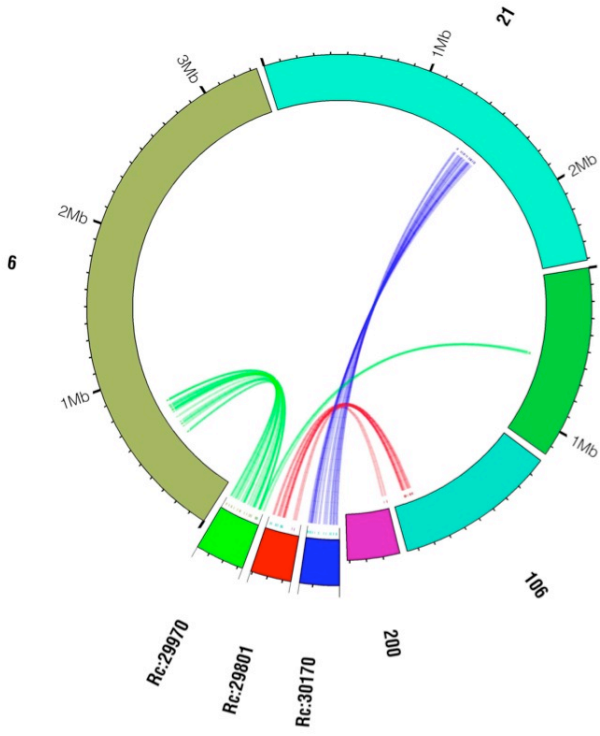

**Papaya**

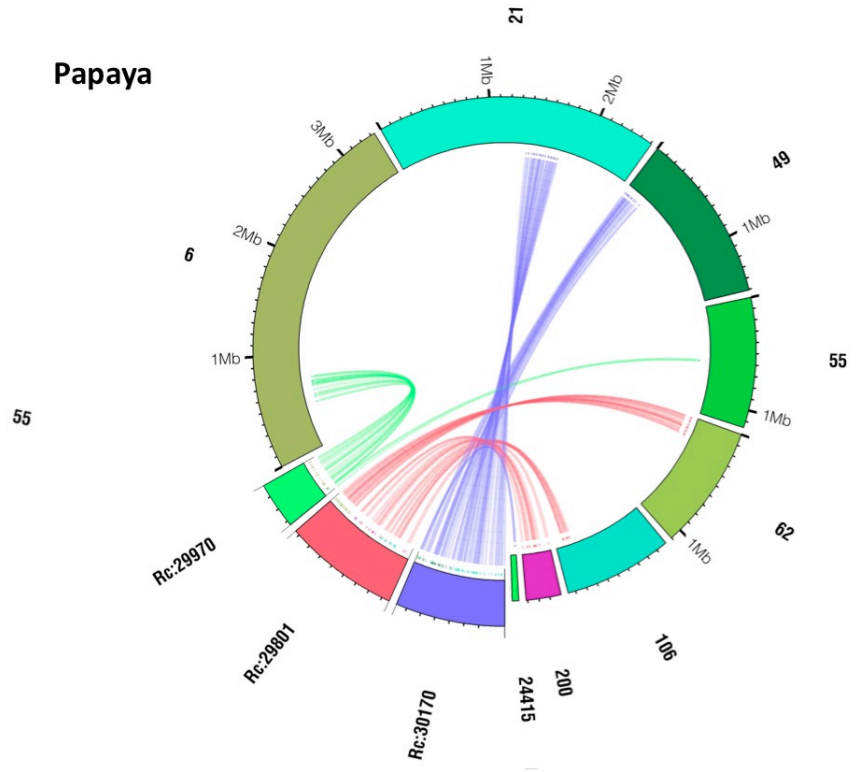

**F**

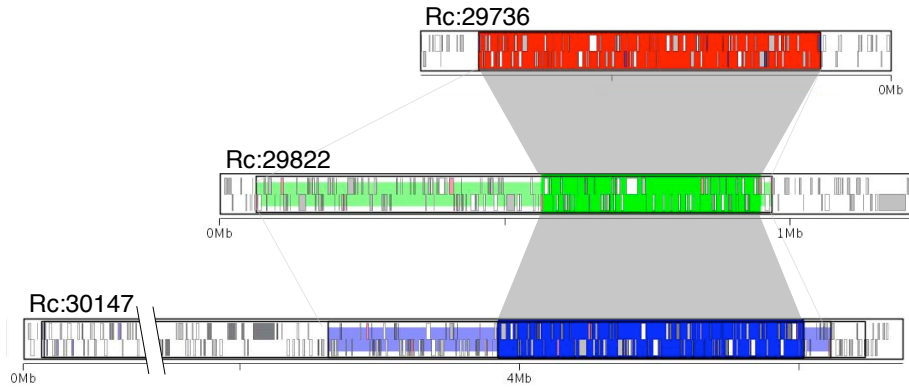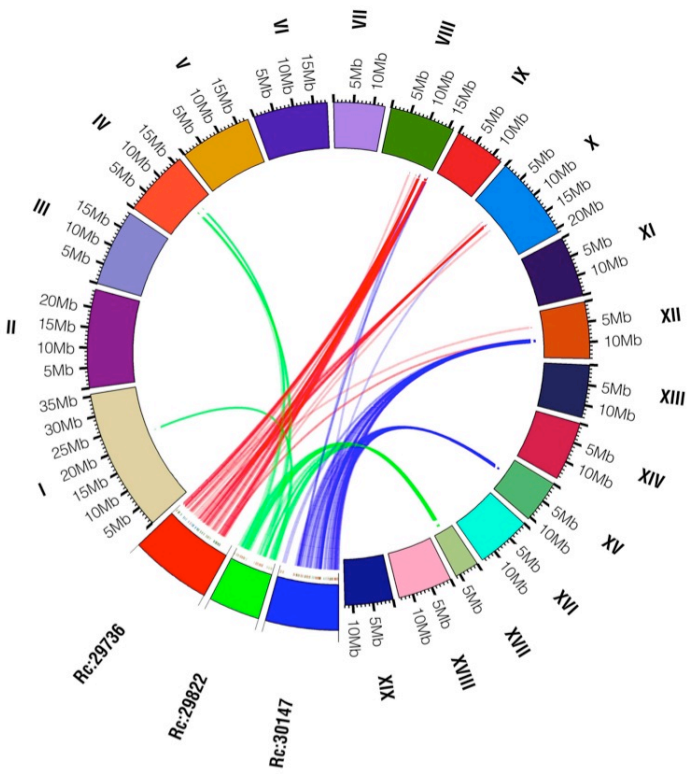

**Poplar**

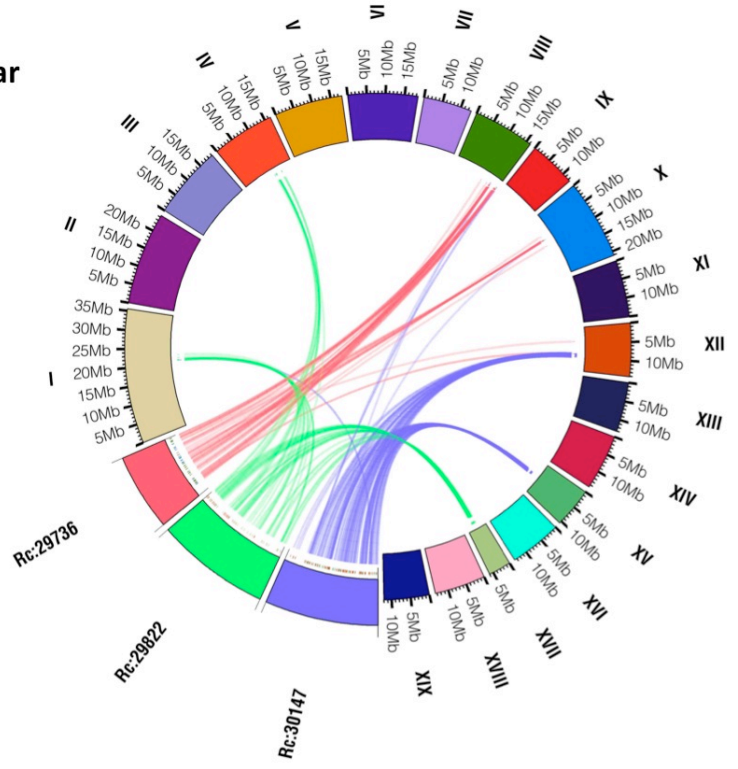



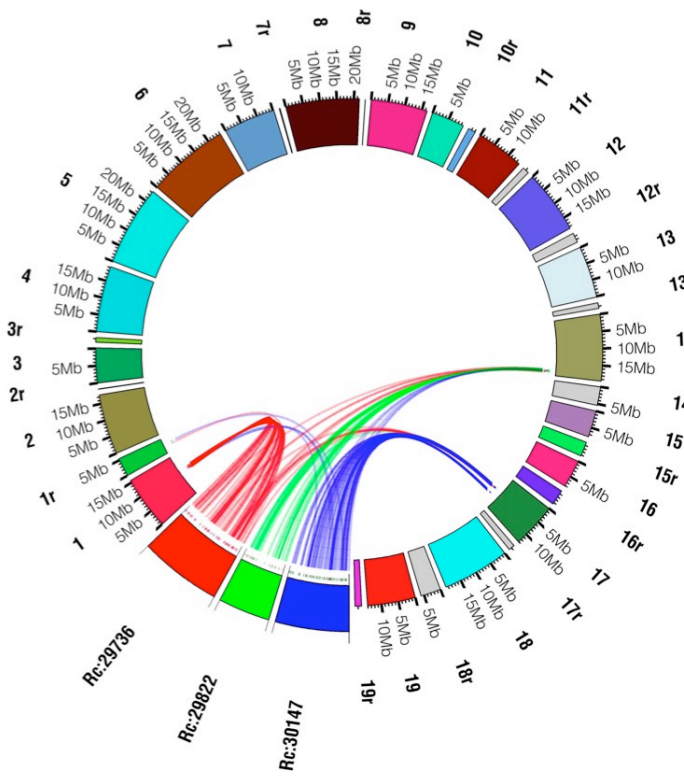

### Grapevine

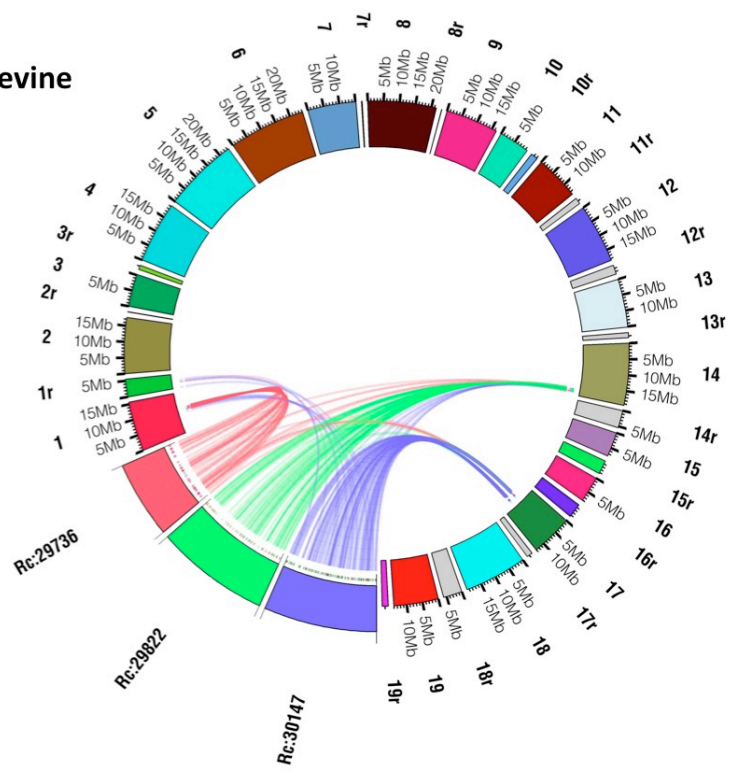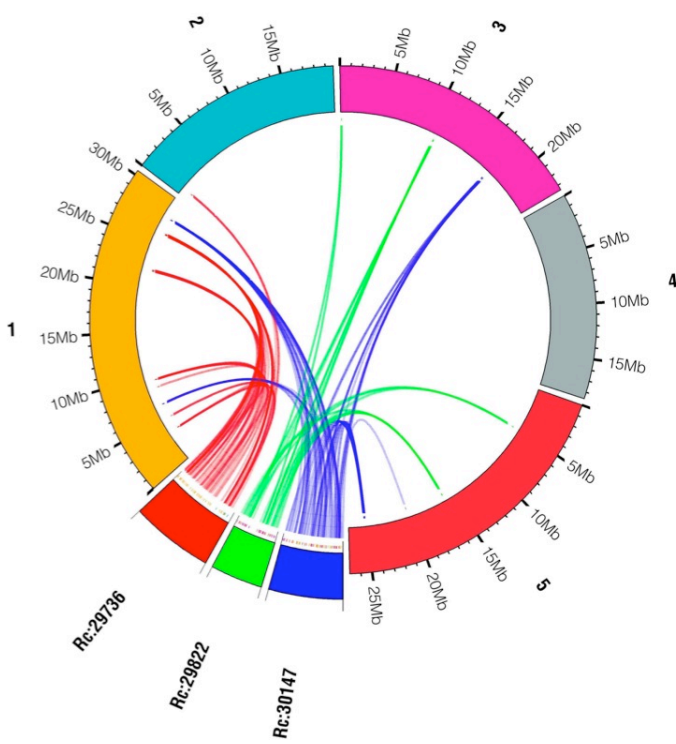

### Arabidopsis

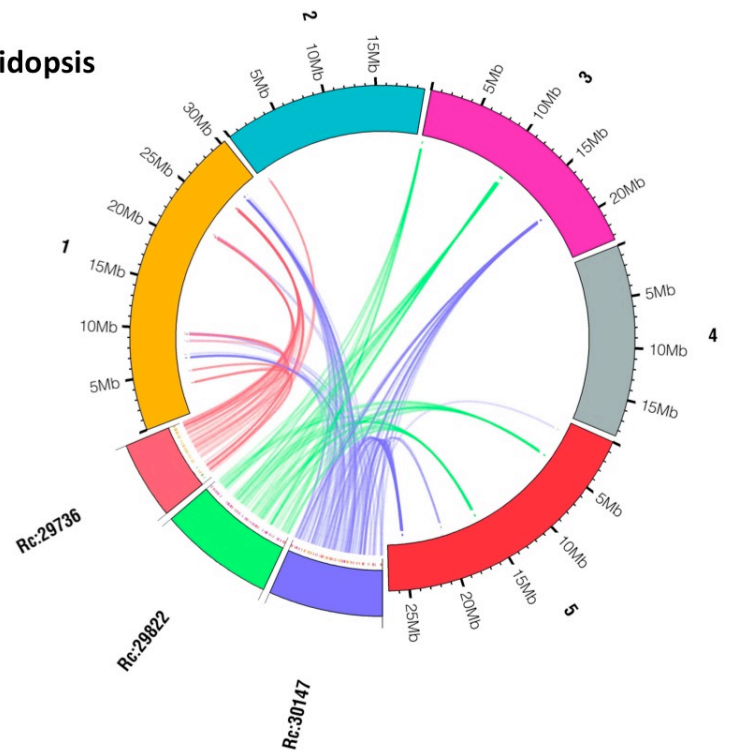

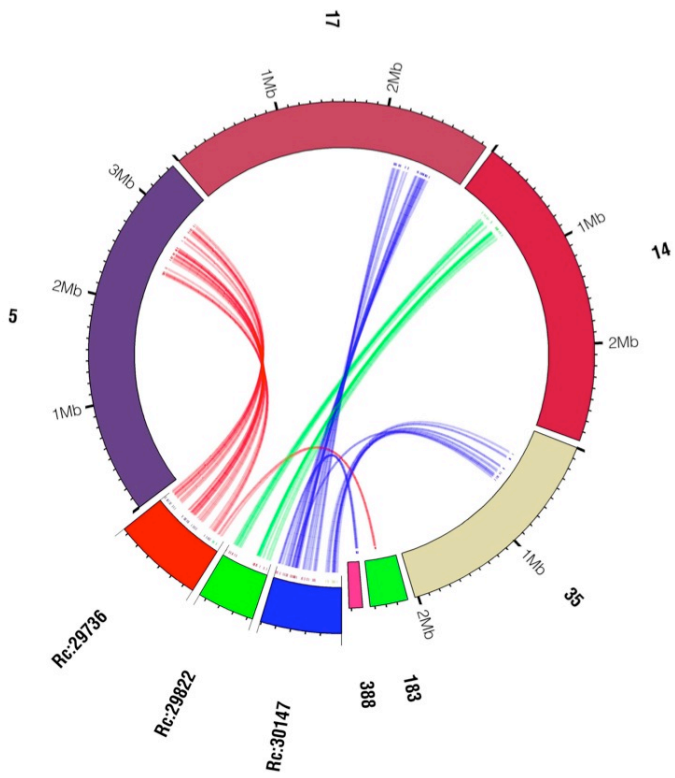

**Papaya**

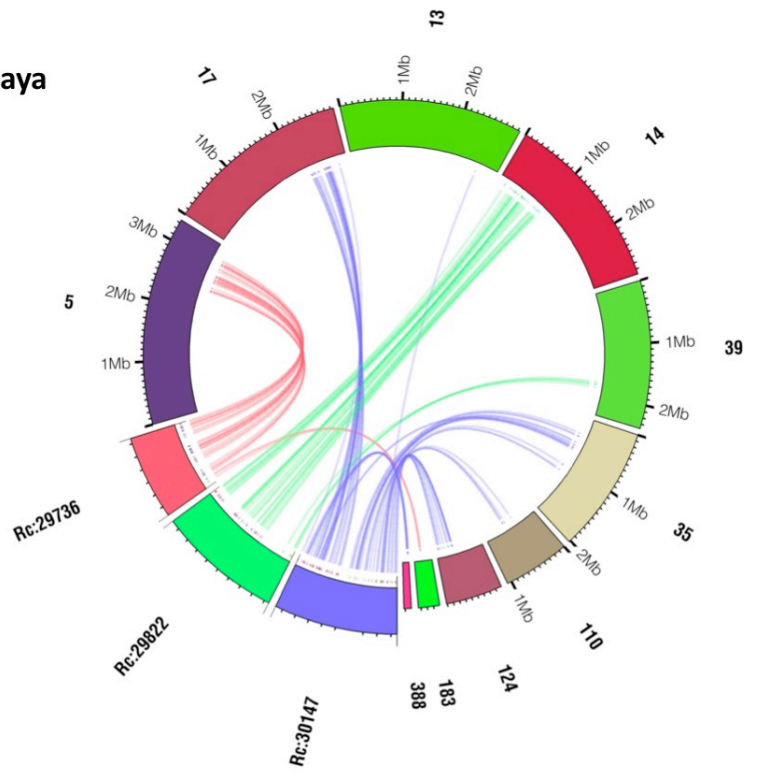

G

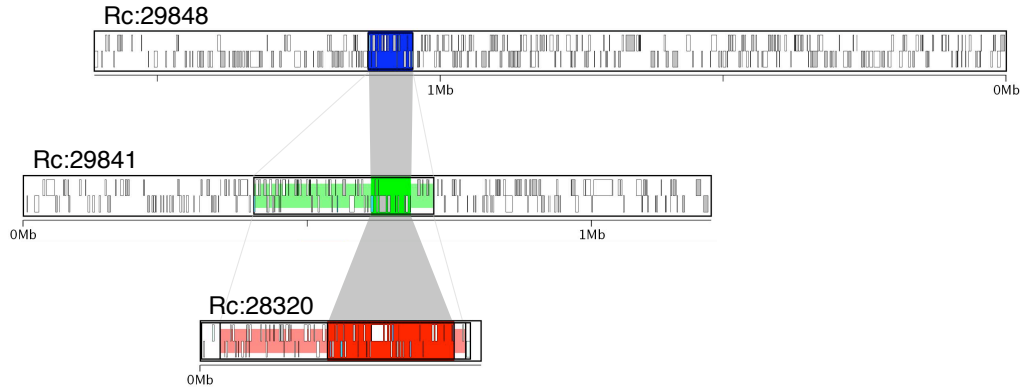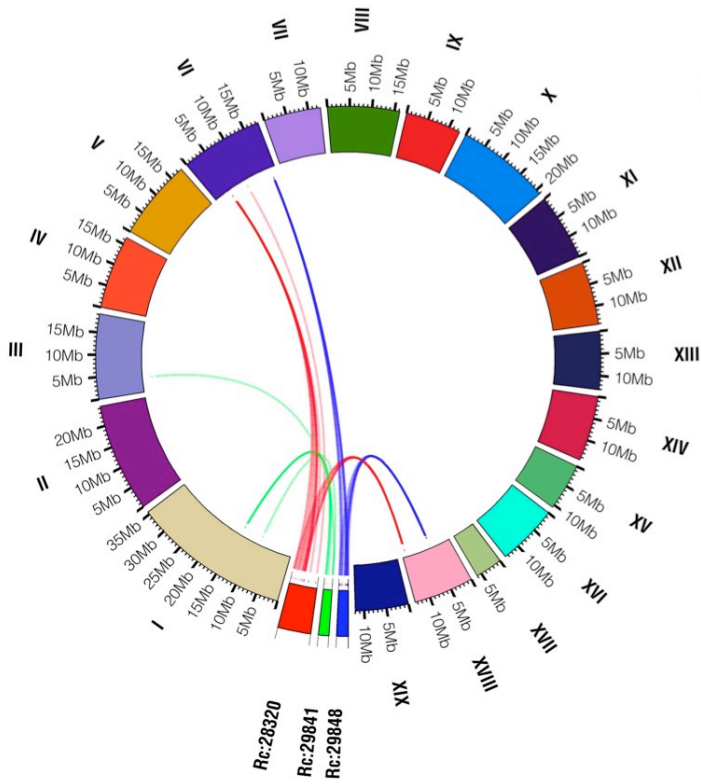

Poplar

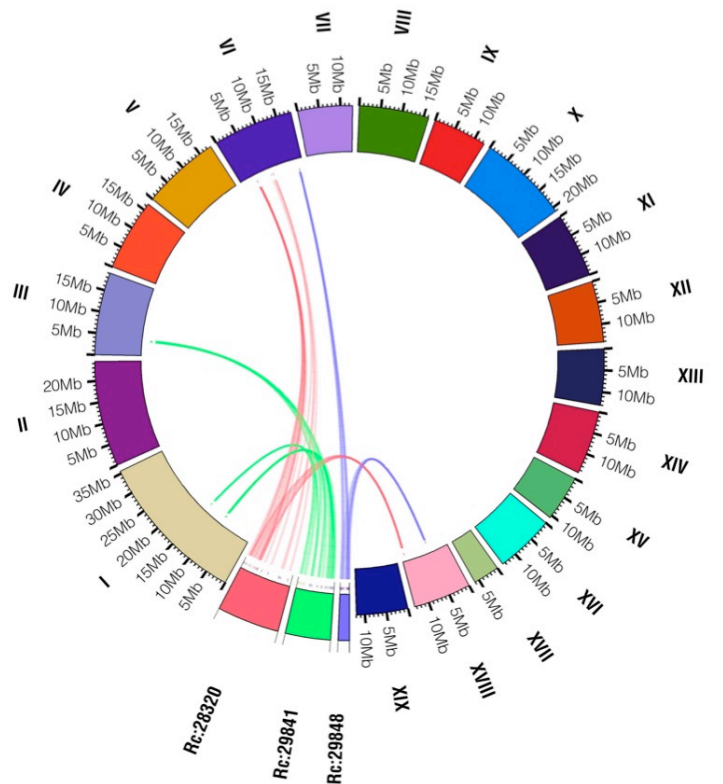

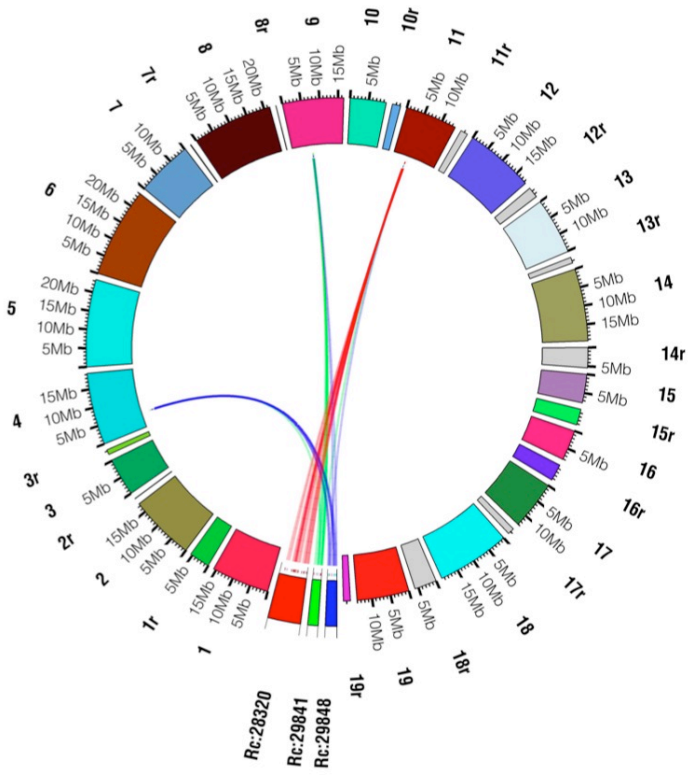

### Grapevine

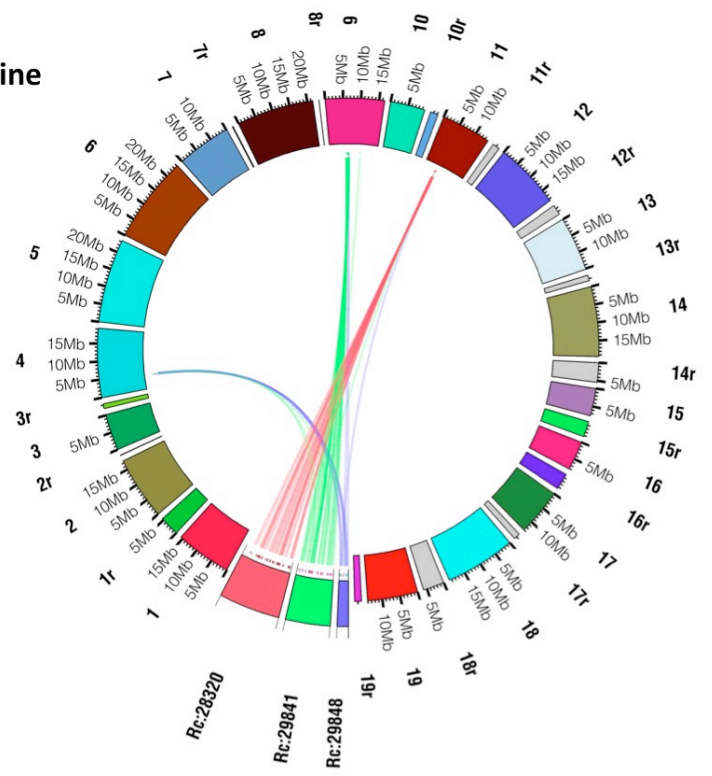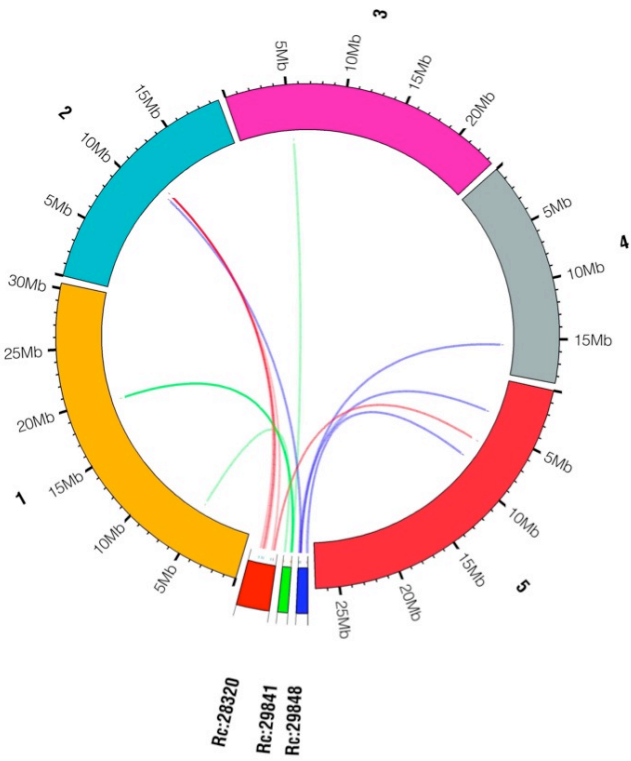

### Arabidopsis

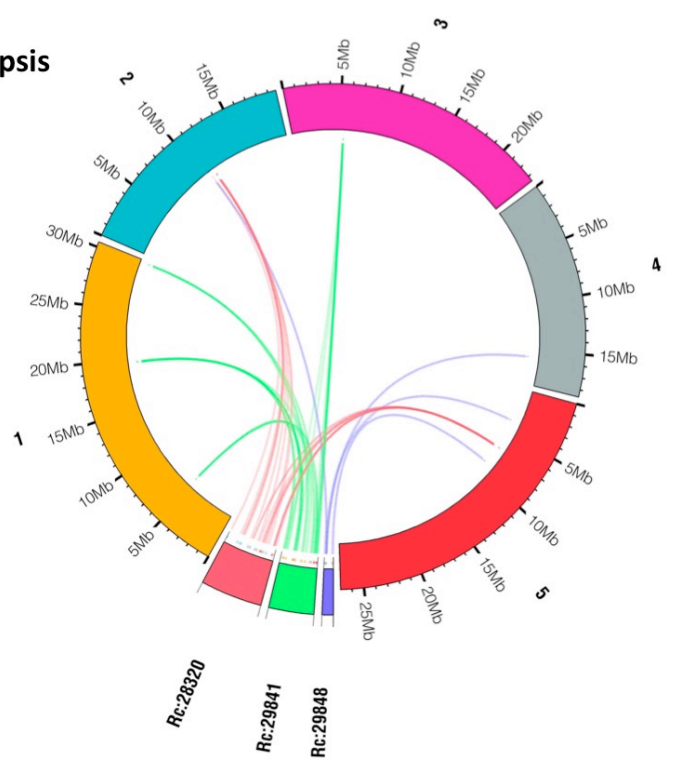



# Papaya

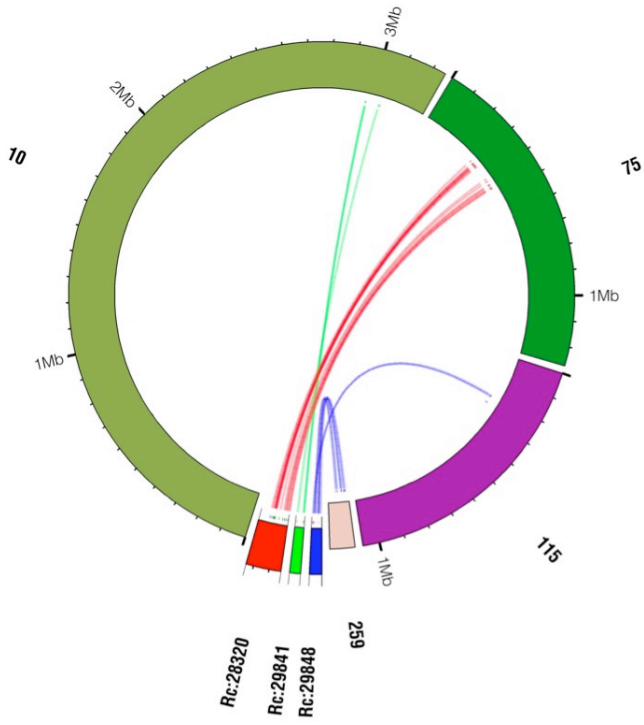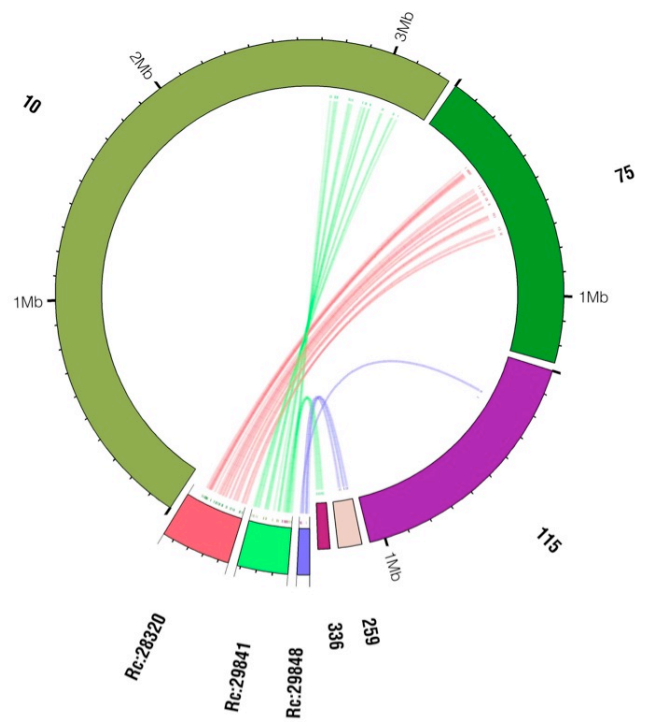

Supplement: NIHMS226448-supplement-1.pdf [file NIHMS226448-supplement-1.pdf]
